# Supplementary material for: Enzymatic Activities and Gene Transcript Levels Associated with the Augmentation of Antioxidant Constituents during Drought Stress in Lettuce
Source: MDPI journal article supplement (doi:10.3390/horticulturae7110444), 2021-11-02
Supplement: s1 [file s1]

# Supplementary Materials: Enzymatic Activities and Gene Transcript Levels Associated with the Augmentation of Antioxidant Constituents during Drought Stress in Lettuce

Ryohei Koyama, Aika Yoshimoto, Misaki Ishibashi, Hiromichi Itoh and Yuichi Uno

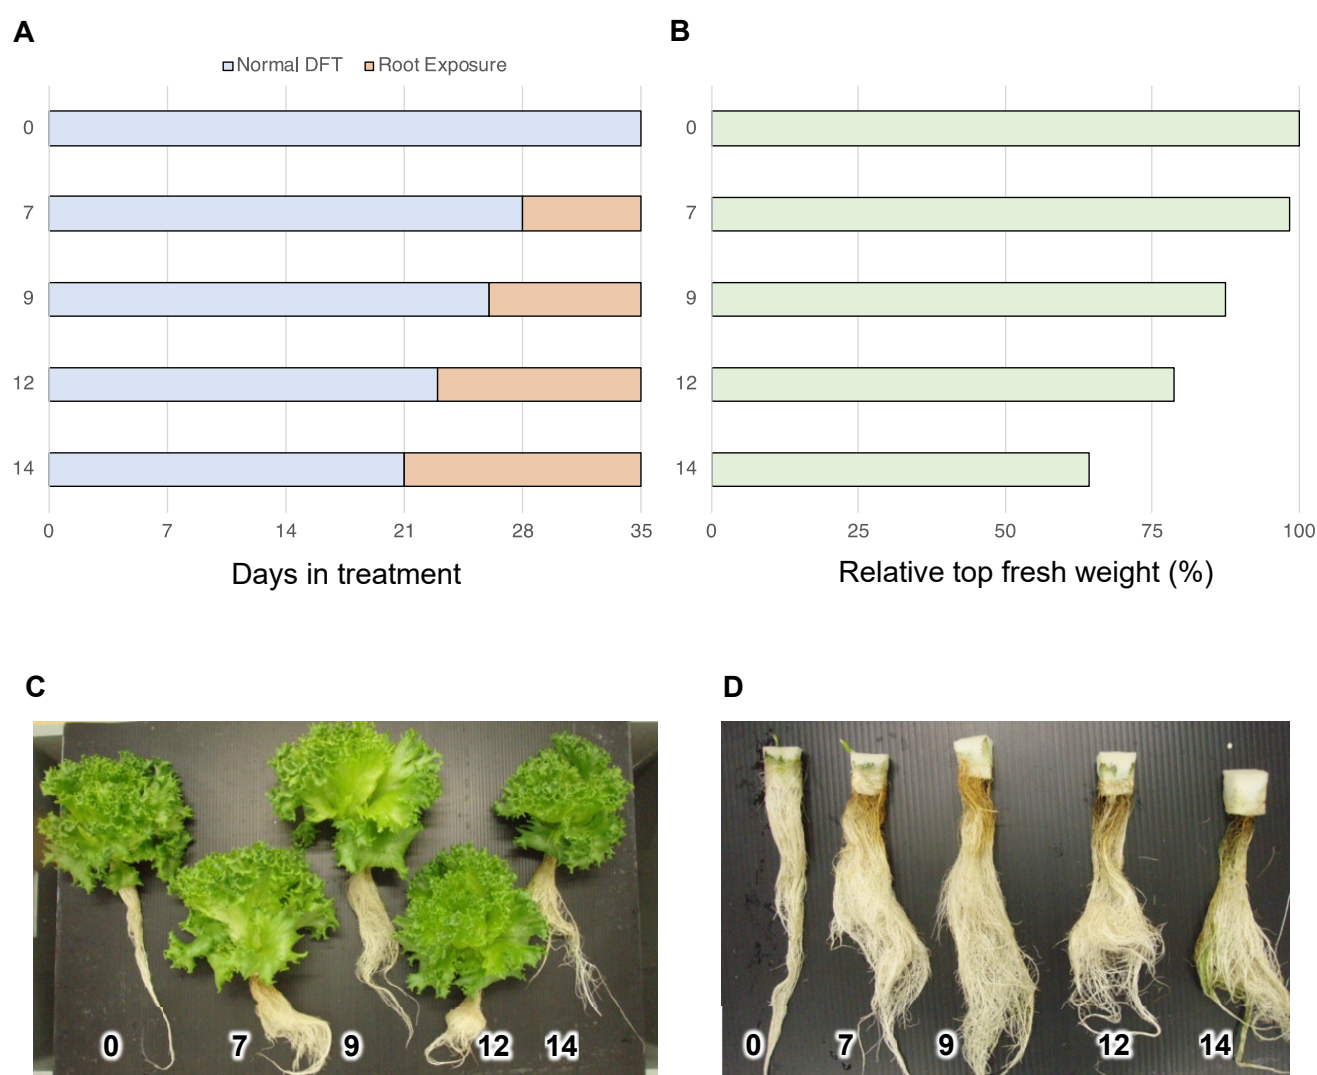

**Figure S1.** Drought stress treatment on lettuce by root exposure to the air. Leaf lettuce was grown by deep flow tech-nique (DFT) hydroponic systems, which was aerated with an air pump. Roots were exposed to the air for 7, 9, 12, and 14 days before harvest (A). Relative top fresh weight was calculated on the basis of the control treatment (0 day). Photos of whole plants (C) and roots (D) were taken at harvest.

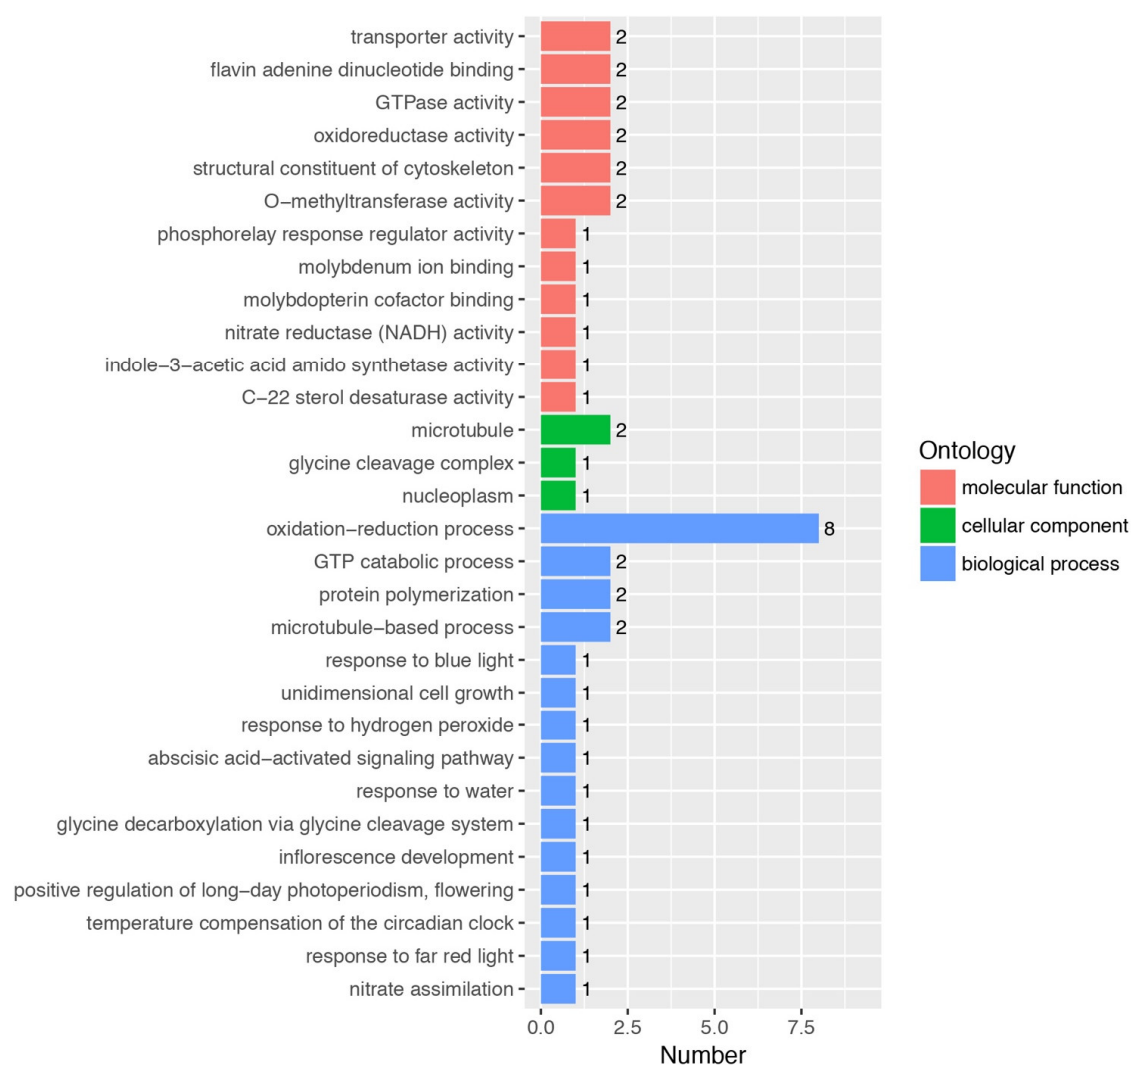

**Figure S2.** GO enrichment histogram by 7 days' drought stress in lettuce identified via the RNA-seq analysis. X axis: number of differentially expressed gene in this GO category. Color code is to distinguish the categories - biological processes, cellular components and molecular functions.
