# Supplementary material for: Enzymatic Activities and Gene Transcript Levels Associated with the Augmentation of Antioxidant Constituents during Drought Stress in Lettuce
Source: MDPI journal article supplement (doi:10.3390/horticulturae7110444), 2021-11-02
Supplement: s1 [file s1]

Archive with 4 entries (4 files):
- Sm.pdf
- TableS1.xlsx
- TableS2.xlsx
- TableS3.xlsx
