# Supplementary material for: Enzymatic Activities and Gene Transcript Levels Associated with the Augmentation of Antioxidant Constituents during Drought Stress in Lettuce
Source: MDPI journal article supplement (doi:10.3390/horticulturae7110444), 2021-11-02
Supplement: s1 [file s1 › TableS1.xlsx]

## Sheet: LsSOD
MnSOD	Name	Gene ID	Amino Acid	Homology to MSD
Query	MSD	AF061518	MAIRCVASRKTLAGLKETSSRLLRIRGIQTFTLPDLPYDYGALEPAISGEIMQIHHQKHHQAYVTNYNNALEQLDQAVNKGDASTVVKLQSAIKFNGGGHVNHSIFWKNLAPSSEGGGEPPKGSLGSAIDAHFGSLEGLVKKMSAEGAAVQGSGWVWLGLDKELKKLVVDTTANQDPLVTKGGSLVPLVGIDVWEHAYYLQYKNVRPEYLKNVWKVINWKYASEVYEKESN*	-
Lettuce	LsMSD1	LSAT_8X13581	MALRTLATAKTLGAISRFQQHVRGLQTFTLPDLSYDYGALEPAISGEIMQLHHQKHHQTYITNYNKAIEQLDDAITKGDASTAVKLQSAIKFNGGGHVNHSIFWKNLAPTSEGGGEPPHGSLGSAINQSFSSVEKLIAKMNAEGAAVQGSGWVWLAVDKELKRLVVETTSNQDPLVTKGPSLVPLIGIDVWEHAYYLQYKNVRPDYLKNIWKVINWKYASEVYEKECP	0.79
	LsMSD2	LSAT_2X125000	MALRTLVSSGKTLGRFSRFQQQIRGLQTFTLPDLAYDYGALEPVISGEIMQLHHQKHHQTYITNYNKALEQLDDAIAKGDASTAVKLQSAIKFNGGGHVNHSIFWKNLAPTSEGGGEAPHGSLGWAIDQHFGSMEKLIAKMNAEGAAVQGSGWVWLAVDKELKRLVVETTANQDPLVTKGATLVPLLGIDVWEHAYYLQYKNVRPDYLKNIWKVINWKYASQVYEKECP*	0.78
	LsMSD3	LSAT_3X39001	MRLRTLATAKTLGAISRFQQHVRGLETFTLPDLSYDYDALEPAISGEIMQLHHQKHHQTYITNYNKAIEQLDDAITKGDASTAVKLQSAIKFNVRGHVNHSIFWKNLAFTSEGGGEPPHGSLGSAINQSFSSVEKLIAKMNAEGAAVQGSGWVWLAVDKELKRLVVETTSNQDPLVTKGPCLVPLLVIDVWEHPYYL*	0.73
FeSOD	Name	Gene ID	Amino Acid	Homology to FSD1	Homology to FSD2	Homology to FSD3
Query	FSD1	M55910	MAASSAVTANYVLKPPPFALDALEPHMSKQTLEFHWGKHHRAYVDNLKKQVLGTELEGKPLEHIIHSTYNNGDLLPAFNNAAQAWNHEFFWESMKPGGGGKPSGELLALLERDFTSYEKFYEEFNAAAATQFGAGWAWLAYSNEKLKVVKTPNAVNPLVLGSFPLLTIDVWEHAYYLDFQNRRPDYIKTFMTNLVSWEAVSARLEAAKAASA	-
	FSD2	Y12641	MSRETLDYHWGKHHKTYVENLNKQILGTDLDALSLEEVVLLSYNKGNMLPAFNNAAQAWNHEFFWESIQPGGGGKPTGELLRLIERDFGSFEEFLERFKSAAASNFGSGWTWLAYKANRLDVANAVNPLPKEEDKKLVIVKTPNAVNPLVWDYSPLLTIDTWEHAYYLDFENRRAEYINTFMEKLVSWETVSTRLESAIARAVQREQEGTETEDEENPDDEVPEVYLDSDIDVSEVD	-
	FSD3	AF061852	MSSCVVTTSCFYTISDSSIRLKSPKLLNLSNQQRRRSLRSRGGLKVEAYYGLKTPPYPLDALEPYMSRRTLEVHWGKHHRGYVDNLNKQLGKDDRLYGYTMEELIKATYNNGNPLPEFNNAAQVYNHDFFWESMQPGGGDTPQKGVLEQIDKDFGSFTNFREKFTNAALTQFGSGWVWLVLKREERRLEVVKTSNAINPLVWDDIPIICVDVWEHSYYLDYKNDRAKYINTFLNHLVSWNAAMSRMARAEAFVNLGEPNIPIA*	-
Lettuce	LsFSD1	LSAT_8X10740	MVMAASHLTSAFSGFSRSLQCPQRQRRCNRKTVHQKISASIDLKPPPYALDALEPHMSKQTFEYHWGKHHRAYVNNLNKQIEGTELDKMTLETIILSSYNKGDILPTFNNAAQIWNHEFFWESMKPNGGGKPSGELLELINRDFGSFEGLINELKSAAATQFGSGWAWLVYKEDEKKLAVVNSPNAINPLVLDYHPLLTIDVWEHAYYLDFQNRRPDYISVFLDKLVSWEAVSLRLEAAKILVAAKEK	0.66	0.59	0.47
	LsFSD2	LSAT_8X11600	MMPMAAAXSHLTSFLSTPEFCGLSRSLQGPQRQRRCTSRSVHWKISASVNLKPPPYSLHALEPHMSKETLEYHWGKHHRAYVDNLNKQIEGTELDEMTLETIISTSYNKGDVLPAFNNAAQVWNHEFFWESMKPNGGGKPSGELLALINRDFGSFGGLINEFKSAATTQFGSGWAWLVYKEHKLDIPNARNPRPSEEDKKLVVVKSPNAVNPLVWEYHPLLAIDVWEHAYYLDFENRRPDYISVFLDKLVSWEAVSLRLEAAKVLVAEREKEMAEIDAVDDVDTGEPEDADNMYFGSDPEEFLDDE	0.61	0.07	0.33
	LsFSD3	LSAT_8X10800	MDLKPLPFALDALEPHMSKETLEYHWGKHHRSYVNNLNKQIEGTELNKMTLESIILTSYNKGDILPTFNNAAQIWNHEFFWETMKPNRGGKPSGELLELRISIGDGLINRDFGSFESVLTELKSAATTQFGSGWAWLVYKEEEKKLVVVNSPNAINPLVLDYHPLLTIDVWEHAYYLDFQNRRPDYVSVFLDKLVSWEAVSLRLEAAKILMIGKKKGVESN	0.6	0.27	0.47
	LsFSD4	LSAT_3X34561	MSWSCSNYLCLSSSTSSSVVNSNELTRFTRCKLSCEYEEQRRKHHDLKKPINIFAYNGLKSPSYKLDKLQKRKDHVLKKPKNISAYYSLKPPSYKLDALEPYMSKRTLEVHWGKHHRGYVEILNKYLSKNDVLYGYTMDELIRVTYNSGNPLPEFNVAAQVWNHDFFWESMQPGGGNLPILGLMEQIEKDFGSFADFRQEFIESALTLFGSGWVWLVLKRNEQRLAIATTTNAVTPLVWDDIPLLSLDMWEHAYYLDYKNDRARYANVFMDHLVSWNAVLGRMARAQAFVNLGEPKIPVA	0.25	0.07	0.61
CuZnSOD	Name	Gene ID	Amino Acid	Homology to CSD1	Homology to CSD2	Homology to CSD3
Query	CSD1	X60935	MAKGVAVLNSSEGVTGTIFFTQEGDGVTTVSGTVSGLKPGLHGFHVHALGDTTNGCMSTGPHFNPDGKTHGAPEDANRHAGDLGNITVGDDGTATFTITDCQIPLTGPNSIVGRAVVVHADPDDLGKGGHELSLATGNAGGRVACGIIGLQG	-
	CSD2	AF061519	MAATNTILAFSSPSRLLIPPSSNPSTLRSSFRGVSLNNNNLHRLQSVSFAVKAPSKALTVVSAAKKAVAVLKGTSDVEGVVTLTQDDSGPTTVNVRITGLTPGPHGFHLHEFGDTTNGCISTGPHFNPNNMTHGAPEDECRHAGDLGNINANADGVAETTIVDNQIPLTGPNSVVGRAFVVHELKDDLGKGGHELSLTTGNAGGRLACGVIGLTPL	-
	CSD3	AF061520	MEAPRGNLRAVALIAGDNNVRGCLQFVQDISGTTHVTGKISGLSPGFHGFHIHSFGDTTNGCISTGPHFNPLNRVHGPPNEEERHAGDLGNILAGSNGVAEILIKDKHIPLSGQYSILGRAVVVHADPDDLGKGGHKLSKSTGNAGSRVGCGIIGLQSSADAKL	-
Lettuce	LsCSD1	LSAT_6X16060	MVKGVAVLNSSEGVSGTILFEQETEGAPTTVTGNLSGLKPGPHGFHVHALGDTTNGCMSTGPHYNPHGKEHGAPDDEVRHAGDLGNVTVGEDGTAKFTIVDKQIPLIGSQSIIGRAVVVHADADDLGKGGHELSKSTGNAGGRVACGIIGLQA	0.78	0.55	0.58
	LsCSD2	LSAT_2X58341	MIIMKLMVEINKRQIRRATGVGIKMGGLKAVAVITGGESSVKGSLQFFQEANGVTHVSGKITGLKPGLHGFHIHALGDTTNGCISTGPHFNPLKNDHGAPQDDVRHAGDLGNIVAGEDGIANVSIEDKHIPLIGQHSILGRAVVIHADPDDLGRGGHELSKTTGNAGARVGCGVIGLQSSV	0.67	0.49	0.59
	LsCSD3	LSAT_6X43340	MAAHSILFSSPAASNSLLFPISNPNTISLQSSFHGVSLKPSIARQSMILSATAPKPLTVVAAVKKAVAVLKGTSSVEGVVTLTQEDSGPTTVNVKITGLTPGPHGFHLHEFGDTTNGCISTGPHFNPNGHTHGAPEDKIRHAGDLGNIIANADGVAEATIVDDQIPLTGPNAVVGRALVVHELADDLGKGGHELSLSTGNAGGRLACGVVGLTPI	0.61	0.71	0.5
CuSOD	Name	Gene ID	Amino Acid	Homology to CSD1	Homology to CSD2	Homology to CSD3
Query	CCS	AT1G12520	MASILRSVATTSAVVAAASAIPIAIAFSSSSSSSSTNPKSQSLNFSFLSRSSPRLLGLSRSFVSSPMATALTSDRNLHQEDRAMPQLLTEFMVDMTCEGCVNAVKNKLETIEGIEKVEVDLSNQVVRILGSSPVKAMTQALEQTGRKARLIGQGVPQDFLVSAAVAEFKGPDIFGVVRFAQVSMELARIEANFTGLSPGTHSWCINEYGDLTNGAASTGSLYNPFQDQTGTEPLGDLGTLEADKNGEAFYSGKKEKLKVADLIGRAVVVYKTDDNKSGPGLTAAVIARSAGVGENYKKLCSCDGTVIWEATNSDFVASKV	-
Lettuce	LsCCS	LSAT_6X10640	MGFLRTVAASSTATAVTAAATALALNSLSPSSSSSYTYNFTKPFLNSFPSTPNRFDLNKTHTKPPSALHMDAKPALMYDAELPEVMTEFMVDMSCEGCVKVVKNKLQTVNGVKSIDVDLSNQVVRIFGSSPVKTMAEALEQTGRKARLIGQGSPGDVLISAAVAEFKGPKIFGVVRLAQISMELARIEANFSGLSPGKKHAWSINEYGDLTKGVASTGKTFNKAVGDLGTLEVDERGEAFFSGVKKDLTVADLIGRAIAVYESEDRSDNGIAAAVIARSAGVGENYKKLCTCDGTTIWEATNADYVSSKV	0.55

## Sheet: LsAPX
LsAPX	Name	Gene ID	Amino Acid		InterPro	PfamScan
Lettuce	LsAPX1-1	LSAT_8X76840	MGKCYPTVSDEYQKAVEKARRKLRGFIADKKCAPLMLRLAWHSAGTYDVKTKTGGPFGTMKNKVELGHAANNGLDIAVRLLEPIKEQFPIISYGDFYQLAGVVAVEVTGGPDVPFHPGREDKEEPPVEGRLPDATKGNDHLRQVFVETMGLEDIDIVTLSGGHTLGAAHKERSGFEGPWTPNPLIFDNSYFTELLAGEKEGLLKLPTDKALLDDPVFRPLVEKYAADEDAFFADYAVSHMKLSELGFADA	-	Heme-binding peroxidase Ccp1-like (IPR044831) →Class I peroxidase (IPR002207)	peroxidase
	LsAPX1-2	LSAT_8X76220	MFWLIIASNRTALTPSEEYQKAVEKAKRKLRGFIADKKIAPLMLRLGWHSASTYDVKTKTKGPFGTMQYNLELGHAANNGLGIAFSLLEPIKEQFPIISYGDFYQLAGDVVEVIGGPDVPFHPGRKDKKEIPNEGRLPDATKGNDHLREVFVETMGLEGIDIVTLSGGHTLGGAHKEISGFEGPWTSTPLIFDNSYFIELLAGEKKGFLKLPTDKALLEDPIFRSLVEKYAVDEDAFFVDYAVSHMKLSELG	-	Heme-binding peroxidase Ccp1-like (IPR044831) →Class I peroxidase (IPR002207)	peroxidase
	LsAPX2	LSAT_9X20460	MTSAIFWLYALILCSLHFNFPFVIFETMGKSYPAVSDEYMKAVDEAKRKLRDLFTEQNCAPLMLRMAFHSAGTFDVNSKTGGPFGTMRQKAEQAHGPNVGLDTAVNLLEPVKQELPIISYADFYMLAGIVAVETTGGPNIPFHPGRQDKDEPPADGRLPLPNQGSDQLRAIFINTMGLNDQDIVALSGGHTLGSCHRDRSGIEGSWTRNPLTFDNSYFKELLAGEKEGLVQLPTDKALLEDPVFRPLVEKFALDQDAFFGAYAESFMKLSELGFADA	-	Heme-binding peroxidase Ccp1-like (IPR044831) →Class I peroxidase (IPR002207)	peroxidase
	LsAPX3-1	LSAT_3X46681	MAMPVVDTEYLKQIDKARRELRAFISNKNCAPIMLRLAWHDAGTYDVNTKTGGPNGSIRNEEEFSHGSNNGLKIAIDFCEEIKSKHPRITYADLYQLAGVVAVEVTGGPTVDFVPGRKDSKISPKEGRLPNATKGAPHLRDIFYRMGLSDKDIVALSGGHTLGKAHADRSGFDGPWTRDPLKFDNSYFVELLKGESEGLLKLPTDIALLDDPAFRPYVELYAKDEDAFFNDYAISHKKLSELGFTPTSAKKVKDGVVLAQSAVGVIVTAAVVILSYVYEVRKKSK	-	Heme-binding peroxidase Ccp1-like (IPR044831) →Class I peroxidase (IPR002207)	peroxidase
	LsAPX3-2	LSAT_3X72581	MAAAAALVVDAEYLKEIEKALRDLRALISNKKCAPIMLRLAWHDAGTYDAKTKTGGPNGSIRNKEEYMHAANTGLKIAIDLCEEVKAKHPRVTYADLYQLAGVVAVEVTGGPTINFKPGRKDSKVSPNEGRLPDAKQGPAHLRDVFYRMGLSDKDIVALSGAHTLGKAHPERSGFDEKPWTKDPFKFDNSYFLELLKGDSEGLLKLPTDKALLHDPNFRNYVELYAKDEDVFFKDYAESHKKLSELGFTPQRSKTVLFAQTAVGVVAAATVVILSYLYEINRKC	-	Heme-binding peroxidase Ccp1-like (IPR044831) →Class I peroxidase (IPR002207)	peroxidase
	LsAPX3-3	LSAT_3X72100	MIKALMGAAGSLLDEEYCKEIEKARRDLRALIFNKNCAPIMLRLAWHDAGTYDAKTKTGGPNGSIRNKEEYMHAANTGLKIAIDLCEEVKAKHPRVTYADLYQLAGVVAVEVTGGPTINFAPGRKDSNESPNEGLLPDAKQGAKHLRDVFYRMGLSDKDIVALSGAHTLGKAHPERSGFDEKPWTKDPFKFDNFYFLELLKEDSDSDSDSDGLLKLPTDKALLDDPNFRTYVELYAKDEEAFLKDYGESHKKLSQLGFTPPLSPNAAYHLRRFVKIIAAVSVILISYTIVSINLAKEINRKC	-	Heme-binding peroxidase Ccp1-like (IPR044831) →Class I peroxidase (IPR002207)	peroxidase
	LsAPX4	LSAT_1X3240	MGLISFLSTVPTLLPIAPLPSYSSSRCPIHSGTISCKIDDAGSHEINGVRRRDVLNCFGAAISMELVASCSPISSPFIETANAADLIQRRQRSDFQSSIKMTLYKAIKANPELISPLLTLALNDSMTYDKPTKTGGPNGSIRFSSEIERPENKGLSAALSMVEEAKKEIDSYSKGGPISYSDLIQLAAQSAVKSTFLASAIRKCGGNEEKGNLLYSAYGSNGQWGLFDRNFGRSDAQEPDPEGRVPNWATASVQEMKDKFIAIGLGPRQLAVMSAFLGPDQLATEAKLATDPDVVKWVEKYQRSRETVSETDYEVDLITALTKMSGLGQNINYEAYSYAVPKIDFKKLKL	-	Heme-binding peroxidase Ccp1-like (IPR044831) →Class I peroxidase (IPR002207)	peroxidase
	LsAPX6	LSAT_6X21420	MSMTGFDLSFRHLCSPYITFRFEFPTQIRRKITCTAIRPTICSTSAPSTAVSDSNENQARTSYGRRMMISMIAFLLPFHQSMQHSSANANAADDLLFLQEEIRKVLTKGKAAGVLRLVFHDAGTYETNENSGGMNGSILYELDRPENKGLKKSLKIILEAKKMVEETQPVSMSVSVSDVIAVAGAEAVSLCGGPKIPVRLGRLDSMVPDPEGKLPEETLDAFGLKQSFKRKGFSTQELVALSGAHTLGSKGFGNPIIFDNSYYKVLLEKPWLSPGGMTSMVGLPSDRGLIEDDECLRWISKYADDQDLFFRDFKNAYIKLVNSGAKWRRPNS	-	Heme-binding peroxidase Ccp1-like (IPR044831) →Class I peroxidase (IPR002207)	peroxidase
	LstAPX	LSAT_6X95861	MAANCSSLTPSPMALSGGSATSSATPRLLSLSPTTTARPSSLSFHFLSSSSSVAASLKCLKLSHHQKRTKLHSSSGDFGAVVTTKCFASNPDQLKSAREDIKELLKTTYCHPIMVCLGWHDAGTYNKNIEEWPQRGGANGSLRFEVEQKHAANAGLVNALKLLQPIKDKYATITYADLFQLASATAIEEAGGPKIPMKYGRVDVSTPDQCPEEGRLPDAGPPSPASHLRDVFYRMGLNDKEIVALSGAHTLGRSRPERSGWGKPETKYTKEGPGAPGGQSWTEKWLKFDNSYFKDIKERRDEDLLVLPTDAALFDDPSFKVFAEKYAEDEKAFFDDYAEAHAKLSNLGAKFDPTEGFSINDEPAAAVPEKFVAAKYSSGKRELSDNMKQKIRAEYEAVG…	-	Heme-binding peroxidase Ccp1-like (IPR044831) →Class I peroxidase (IPR002207)	peroxidase
LsAPX	Name	Gene ID	Amino Acid	Homology to AtAPX1
Query	AtAPX1	AT1G07890	MTKNYPTVSEDYKKAVEKCRRKLRGLIAEKNCAPIMVRLAWHSAGTFDCQSRTGGPFGTMRFDAEQAHGANSGIHIALRLLDPIREQFPTISFADFHQLAGVVAVEVTGGPDIPFHPGREDKPQPPPEGRLPDATKGCDHLRDVFAKQMGLSDKDIVALSGAHTLGRCHKDRSGFEGAWTSNPLIFDNSYFKELLSGEKEGLLQLVSDKALLDDPVFRPLVEKYAADEDAFFADYAEAHMKLSELGFADA	-
Lettuce	LsAPX1-1	LSAT_8X76840	MGKCYPTVSDEYQKAVEKARRKLRGFIADKKCAPLMLRLAWHSAGTYDVKTKTGGPFGTMKNKVELGHAANNGLDIAVRLLEPIKEQFPIISYGDFYQLAGVVAVEVTGGPDVPFHPGREDKEEPPVEGRLPDATKGNDHLRQVFVETMGLEDIDIVTLSGGHTLGAAHKERSGFEGPWTPNPLIFDNSYFTELLAGEKEGLLKLPTDKALLDDPVFRPLVEKYAADEDAFFADYAVSHMKLSELGFADA	0.76
	LsAPX1-2	LSAT_8X76220	MFWLIIASNRTALTPSEEYQKAVEKAKRKLRGFIADKKIAPLMLRLGWHSASTYDVKTKTKGPFGTMQYNLELGHAANNGLGIAFSLLEPIKEQFPIISYGDFYQLAGDVVEVIGGPDVPFHPGRKDKKEIPNEGRLPDATKGNDHLREVFVETMGLEGIDIVTLSGGHTLGGAHKEISGFEGPWTSTPLIFDNSYFIELLAGEKKGFLKLPTDKALLEDPIFRSLVEKYAVDEDAFFVDYAVSHMKLSELG	0.64
LsAPX	Name	Gene ID	Amino Acid	Homology to AtAPX2
Query	AtAPX2	AT3G09640	MVKKSYPEVKEEYKKAVQRCKRKLRGLIAEKHCAPIVLRLAWHSAGTFDVKTKTGGPFGTIRHPQELAHDANNGLDIAVRLLDPIKELFPILSYADFYQLAGVVAVEITGGPEIPFHPGRLDKVEPPPEGRLPQATKGVDHLRDVFGRMGLNDKDIVALSGGHTLGRCHKERSGFEGAWTPNPLIFDNSYFKEILSGEKEGLLQLPTDKALLDDPLFLPFVEKYAADEDAFFEDYTEAHLKLSELGFADKE	-
Lettuce	LsAPX2	LSAT_9X20460	MTSAIFWLYALILCSLHFNFPFVIFETMGKSYPAVSDEYMKAVDEAKRKLRDLFTEQNCAPLMLRMAFHSAGTFDVNSKTGGPFGTMRQKAEQAHGPNVGLDTAVNLLEPVKQELPIISYADFYMLAGIVAVETTGGPNIPFHPGRQDKDEPPADGRLPLPNQGSDQLRAIFINTMGLNDQDIVALSGGHTLGSCHRDRSGIEGSWTRNPLTFDNSYFKELLAGEKEGLVQLPTDKALLEDPVFRPLVEKFALDQDAFFGAYAESFMKLSELGFADA	0.64
LsAPX	Name	Gene ID	Amino Acid	Homology to AtAPX3
Query	AtAPX3	AT4G35000	MAAPIVDAEYLKEITKARRELRSLIANKNCAPIMLRLAWHDAGTYDAQSKTGGPNGSIRNEEEHTHGANSGLKIALDLCEGVKAKHPKITYADLYQLAGVVAVEVTGGPDIVFVPGRKDSNVCPKEGRLPDAKQGFQHLRDVFYRMGLSDKDIVALSGGHTLGRAHPERSGFDGPWTQEPLKFDNSYFVELLKGESEGLLKLPTDKTLLEDPEFRRLVELYAKDEDAFFRDYAESHKKLSELGFNPNSSAGKAVADSTILAQSAFGVAVAAAVVAFGYFYEIRKRMK	-
Lettuce	LsAPX3-1	LSAT_3X46681	MAMPVVDTEYLKQIDKARRELRAFISNKNCAPIMLRLAWHDAGTYDVNTKTGGPNGSIRNEEEFSHGSNNGLKIAIDFCEEIKSKHPRITYADLYQLAGVVAVEVTGGPTVDFVPGRKDSKISPKEGRLPNATKGAPHLRDIFYRMGLSDKDIVALSGGHTLGKAHADRSGFDGPWTRDPLKFDNSYFVELLKGESEGLLKLPTDIALLDDPAFRPYVELYAKDEDAFFNDYAISHKKLSELGFTPTSAKKVKDGVVLAQSAVGVIVTAAVVILSYVYEVRKKSK	0.77
	LsAPX3-2	LSAT_3X72581	MAAAAALVVDAEYLKEIEKALRDLRALISNKKCAPIMLRLAWHDAGTYDAKTKTGGPNGSIRNKEEYMHAANTGLKIAIDLCEEVKAKHPRVTYADLYQLAGVVAVEVTGGPTINFKPGRKDSKVSPNEGRLPDAKQGPAHLRDVFYRMGLSDKDIVALSGAHTLGKAHPERSGFDEKPWTKDPFKFDNSYFLELLKGDSEGLLKLPTDKALLHDPNFRNYVELYAKDEDVFFKDYAESHKKLSELGFTPQRSKTVLFAQTAVGVVAAATVVILSYLYEINRKC	0.75
	LsAPX3-3	LSAT_3X72100	MIKALMGAAGSLLDEEYCKEIEKARRDLRALIFNKNCAPIMLRLAWHDAGTYDAKTKTGGPNGSIRNKEEYMHAANTGLKIAIDLCEEVKAKHPRVTYADLYQLAGVVAVEVTGGPTINFAPGRKDSNESPNEGLLPDAKQGAKHLRDVFYRMGLSDKDIVALSGAHTLGKAHPERSGFDEKPWTKDPFKFDNFYFLELLKEDSDSDSDSDGLLKLPTDKALLDDPNFRTYVELYAKDEEAFLKDYGESHKKLSQLGFTPPLSPNAAYHLRRFVKIIAAVSVILISYTIVSINLAKEINRKC	0.67
LsAPX	Name	Gene ID	Amino Acid	Homology to AtAPX4
Query	AtAPX4	AT4G09010	MGGVSFLSTVPSFTNTTNHQHLTTLSSSSHRSAVIRCSKIEPQVSGESLAFHRRDVLKLAGTAVGMELIGNGFINNVGDAKAADLNQRRQRSEFQSKIKILLSTTIKAKPELVPSLLKLALNDAMTYDKATKSGGANGSIRFSSELSRAENEGLSDGLSLIEEVKKEIDSISKGGPISYADIIQLAGQSAVKFTYLASAIRKCGGNEEKGNLLYTAYGSAGQWGLFDRNFGRSDATEADPEGRVPQWGKATVQEMKDKFIAVGLGPRQLAVMSAFLGPDQAATEQLLATDPQVAPWVQKYQRSRETVSQTDYEVDLITAFTKLSCLGQQINFEAYTYPVERINLSKLKL	-
Lettuce	LsAPX4	LSAT_1X3240	MGLISFLSTVPTLLPIAPLPSYSSSRCPIHSGTISCKIDDAGSHEINGVRRRDVLNCFGAAISMELVASCSPISSPFIETANAADLIQRRQRSDFQSSIKMTLYKAIKANPELISPLLTLALNDSMTYDKPTKTGGPNGSIRFSSEIERPENKGLSAALSMVEEAKKEIDSYSKGGPISYSDLIQLAAQSAVKSTFLASAIRKCGGNEEKGNLLYSAYGSNGQWGLFDRNFGRSDAQEPDPEGRVPNWATASVQEMKDKFIAIGLGPRQLAVMSAFLGPDQLATEAKLATDPDVVKWVEKYQRSRETVSETDYEVDLITALTKMSGLGQNINYEAYSYAVPKIDFKKLKL	0.63
LsAPX	Name	Gene ID	Amino Acid	Homology to AtAPX5
Query	AtAPX5	AT4G35970	MAVNVDAEYLKEIEKTRRDLRALISSRNCAPIMLRLAWHDAGTYDAKKKTGGANGSIRFKEELNRPHNKGLEKAVAFCEEVKAKHPRVSYADLYQLAGVVAVEVTGGPAIPFTPGRKDADSADDGELPNPNEGASHLRTLFSRMGLLDRDIVALSGGHTLGRAHKERSDFEGPWTQDPLKFDNSYFVELLKGETPGLLQLKTDKALLDDPKFHPFVKLYAKVD	-
LsAPX	Name	Gene ID	Amino Acid	Homology to AtAPX6
Query	AtAPX6	AT4G32320	MTTTTASLVKTFLFRCDSFSSFKFKCKFESPAKTRLLSPATEKHVVRSSRAWRIRCLSDDPGSSHVFVASRRKMVVLLSTVQLLSHMLPQNGNAAEIYPVMQNEIRKVVTKGKAAGVLRLVFHDAGTFELDDHSGGINGSIAYELERPENIGLKKSLKVLAKAKVKVDEIQPVSWADMISVAGSEAVSICGGPTIPVVLGRLDSAQPDPEGKLPPETLSASGLKECFKRKGFSTQELVALSGAHTIGSKGFGDPTVFDNAYYKILLEKPWTSTSKMTSMVGLPSDHALVQDDECLRWVKRYAEDQDKFFEDFTNAYIKLVNSGAKWNML	-
Lettuce	LsAPX6	LSAT_6X21420	MSMTGFDLSFRHLCSPYITFRFEFPTQIRRKITCTAIRPTICSTSAPSTAVSDSNENQARTSYGRRMMISMIAFLLPFHQSMQHSSANANAADDLLFLQEEIRKVLTKGKAAGVLRLVFHDAGTYETNENSGGMNGSILYELDRPENKGLKKSLKIILEAKKMVEETQPVSMSVSVSDVIAVAGAEAVSLCGGPKIPVRLGRLDSMVPDPEGKLPEETLDAFGLKQSFKRKGFSTQELVALSGAHTLGSKGFGNPIIFDNSYYKVLLEKPWLSPGGMTSMVGLPSDRGLIEDDECLRWISKYADDQDLFFRDFKNAYIKLVNSGAKWRRPNS	0.5
LsAPX	Name	Gene ID	Amino Acid	Homology to AttAPX
Query	AttAPX	AT1G77490	MSVSLSAASHLLCSSTRVSLSPAVTSSSSSPVVALSSSTSPHSLGSVASSSLFPHSSFVLQKKHPINGTSTRMISPKCAASDAAQLISAKEDIKVLLRTKFCHPILVRLGWHDAGTYNKNIEEWPLRGGANGSLRFEAELKHAANAGLLNALKLIQPLKDKYPNISYADLFQLASATAIEEAGGPDIPMKYGRVDVVAPEQCPEEGRLPDAGPPSPADHLRDVFYRMGLDDKEIVALSGAHTLGRARPDRSGWGKPETKYTKTGPGEAGGQSWTVKWLKFDNSYFKDIKEKRDDDLLVLPTDAALFEDPSFKNYAEKYAEDVAAFFKDYAEAHAKLSNLGAKFDPPEGIVIENVPEKFVAAKYSTGKKELSDSMKKKIRAEYEAIGGSPDKPLPTNYFL…	-
Lettuce	LstAPX	LSAT_6X95861	MAANCSSLTPSPMALSGGSATSSATPRLLSLSPTTTARPSSLSFHFLSSSSSVAASLKCLKLSHHQKRTKLHSSSGDFGAVVTTKCFASNPDQLKSAREDIKELLKTTYCHPIMVCLGWHDAGTYNKNIEEWPQRGGANGSLRFEVEQKHAANAGLVNALKLLQPIKDKYATITYADLFQLASATAIEEAGGPKIPMKYGRVDVSTPDQCPEEGRLPDAGPPSPASHLRDVFYRMGLNDKEIVALSGAHTLGRSRPERSGWGKPETKYTKEGPGAPGGQSWTEKWLKFDNSYFKDIKERRDEDLLVLPTDAALFDDPSFKVFAEKYAEDEKAFFDDYAEAHAKLSNLGAKFDPTEGFSINDEPAAAVPEKFVAAKYSSGKRELSDNMKQKIRAEYEAVG…	0.69
LsAPX	Name	Gene ID	Amino Acid	Homology to AtsAPX
Query	AtsAPX	AT4G08390	MAERVSLTLNGTLLSPPPTTTTTTMSSSLRSTTAASLLLRSSSSSSRSTLTLSASSSLSFVRSLVSSPRLSSSSSLSQKKYRIASVNRSFNSTTAATKSSSSDPDQLKNAREDIKELLSTKFCHPILVRLGWHDAGTYNKNIKEWPQRGGANGSLRFDIELKHAANAGLVNALNLIKDIKEKYSGISYADLFQLASATAIEEAGGPKIPMKYGRVDASGPEDCPEEGRLPDAGPPSPATHLREVFYRMGLDDKDIVALSGAHTLGRSRPERSGWGKPETKYTKEGPGAPGGQSWTPEWLKFDNSYFKEIKEKRDEDLLVLPTDAAIFEDSSFKVYAEKYAADQDAFFKDYAVAHAKLSNLGAEFNPPEGIVI	-

## Sheet: LsDHN
LsDHN	Name	Gene ID	Amino Acid	Homology to DHN xero1
Query	AtDHN Xero1		mesyqnqsgaqqthqqldqfgnpfpattgaygtaggapavaeggglsgmlhrsgssssssseddglggrrrkkkgitekikeklpghhdsnktsslgstttaydtgtvhhekkgmmekikeklpgghh	-
LsDHN	1	LSAT_3X75820	maqyggdqkygregrhtdeygnpirktdefgnpihsttegtmgdygitghqglghttggtgtdyktsggygttghqglgtnighatgglgsdygttghqglgmgtdyktsgtgghgttghhgigtdvghrtggtgdhygtggatesyqnqpsatpfagggigtgtgagyeglgvaghkqpsatpfadtvtgtgtgtgydrhreeghekkgvmekikeklpgvhstdehqrvsttttggvggggygeggethekkgvmekikeklpghh	0.25
	2	LSAT_5X120481	mqeihdelgrpiqltdefgrpvqltdehgvpvkltgvattqghthttigselqdkitpgfattdqgynhttigselrhktmhdqttdttmgsethggthfaptpidylkhgagavagagaatvgaaagaakgavtgggapvshtqahgaaggdekqlehespsssspsseddgeggrrkkkglmqkikeklpgrhkkeekqatahsantkvssagegpasirvehhdekkgpidkikeklpgth	0.24
	3	LSAT_2X78000	maqyggeqyahkeghhtdehahnplqstgavghdtidatkinsigtgaahghaheqvkhndagaggvlhrsgsgssssseddgeggrrkkkgvvekikeklpggdeqktssatttvgtgvgvgyqgeeghekkglmdkikeklpgshq	0.22
	4	LSAT_3X77021	maqyagdqkygregqhtdeygnpvrktdeygnplhssipftstgagigtgtgtgydqeghekkgvmekikeklpgghntvehqrvsttkaggfaggygeggethekkgvmekikeklpgghntvehqrvstttagsvggsyveggeaqekkgvmekikeklpgghntnehqrvsttmagghhgvsggyvegrethekkgvieklkeklpgghntdehqsvpptttsgvgggdygegreihakkgvienikeklpgvhstnehqrvstttagghngvgggyvegrethekkgvmekikekfpgshntdghqrvsttttggvggggygegrethakkgvmenikeklpgvhntdedqrvstttgghnaigggyvegrettekkgvmekikeklpgghntdg…	0.21
	5	LSAT_3X74801	maeygdqtygregrqtdeygnpvqktneygnplhsttdetmgdygvtshqglghatgetesyqnqpsatplsssnigigtgagydqhreeghekkgvtekikeklpgghntdehstttaggvggggygegethekkgvmekikdklsgh	0.21
	6	LSAT_8X27820	msdegvyhsapkteecvetstvvaepetveksdrglfdmfgkkdeekkceeaaissefeqkvqvshpepeekkeslleklhrsdsssssssdeecdengekkkkkkplkekikekltkqedettvpiekydvaplqhgppepeekkgfmekikeklpgghkkeeelaatppppppavvthadegeqkekkgifekikekipgyhskseeekekekvkecd	0.19
	7	LSAT_8X28441	msdkkeyneevvekadrglfdifgtkaeekkgeeaaissefeqkvqvshpepeenkeslpdklhksdshsssssdeecdesgekkkkkkplkekitkpeekkgfiekikeklpgghkkeeeehadegehkekkgifekikekipgyhsksdeekekekvkesd	0.16
	8	LSAT_9X46540	madkvvhhhasetedhgvvdcfgkkdenkkcnkdekneslmhklhisdssssssdeeckdgekkkmkkkkkkdetlkekvekkieedkvkinvkieegkekveelkektiekmeegkekvleikeklgekieeykekkeeerkedscvpvekyedhqappppppcevvvhppepscepeekkgflemikdklpggqkkleeehtapppppvvvavaahpdhyadvekehkekkgilemikeklpgyhskseeekkekecd	0.15
	9	LSAT_2X78020	maqyggeqhgheeghhtdeqahnplqstavghdedieatktntigtgaahghvdeqgkhngagaggilhlsgsgnstsseddgeggrrkkkgvvekikeklpggdeqdasttttvetgggvgyegedeghekkglmeqineklsgsqq	0.14
	10	LSAT_3X74761	maqygdqkyegegpqtdeygnpipktdaygnplhsttektkgeygvtghqglghatgatksyqnkpsatpysgsdigtgtgagyeglgvaghkqssastgmgtdigtktgtgydqhseegyeklvgahstddhqkvsttkaggfaggygeggeteekkgvmenikeklpgckntdehqrvstttvggvggggygegethekkgvmekikeklsggqntdghqnvstttaggigsgyveggethqkkgmtekiketlpgghnteehqrvssttggvgggcygeggerhekkgvmekikeklpgnh	0.14
	11	LSAT_3X77001	MLEVEFNVESLLMEIGAHLNYYIPSLFQPVTGYFSSIPFTDEYGNPLHSSIPFTNTGAGIGIGTGTGYDQEGHAKKGVMEKIKEKIPGGHNTVEHQRVSTTKAGGFAGGYGEGGETHEKKGVMEKIKEKLPGGHNTVEHQRVSKTTTGGVGGSYVEGGEAQEKKGVMEKIKEKLPSGHNTNEHQRVSTTTAGGHHGVSGGYVE	0.13
	12	LSAT_3X76921	mekikeklpgghnndehqrvsattggvgdnyleggetheqkgvtekikeklpggystdehqrvststiygvggggntygeggethenkgmmekikerlpgdhntdehqrvptttvssidggyveggethekkgvmekikdklpggnisehqtvsstttrgvggggygergetyekkgvmekikeklpggdntdehqgvstttsggiggggygeggethekkgvmekikeklpghh	0.11
	13	LSAT_8X28421	mskevvyhtapttyvetttvvevghdtveqsdrgmfyifgkkedetkfddeqqalkvkseklkqdlldfihhtnssssnviqhktsvplmqkyeeeihvvqstekkgfiekiksdhqdktsvpiqkgeethvvqskekkgiiekikdklhdspiekikeklpghhkkaeevhaahpptpavvahahegehkekkgifekikdkipghhpkseeqkkgk	0.08
	14	LSAT_9X108041	madirdqagnpiqltdelgrpvqltdefgrpmhltgvattkdsgfhagttigsdlkthdgtrvaptipeavpggagagtavpcggegerreigrsgssssssseddgqggrrkkkkglmqkikeklpghknkeekapekvytattkisvttpagplgepkpefvrvehheeehekkglmdkikdklpghhsh	0.07
	15	LSAT_3X76981	MEKVKEKLPGGHNTDGHQRVSTTTTGGVGGGGYGEGRETHTKKGVMENIKEKLPGVHNTNEDQRVSTTTGGHNAIGGGYVEGGETHEKKWVMEKIKEKLPGGHNTDRHQSVSTTTSTGVGGGGYMEGRETHEKKWVMEKIKEKLPGHH	0.07
