# Supplementary material for: Enzymatic Activities and Gene Transcript Levels Associated with the Augmentation of Antioxidant Constituents during Drought Stress in Lettuce
Source: MDPI journal article supplement (doi:10.3390/horticulturae7110444), 2021-11-02
Supplement: s1 [file s1 › TableS2.xlsx]

## Sheet: SppTable(Group_Control-VS-Dry_D
geneID	length	Control.rawreads	Control.FPKM	Dry.rawreads	Dry.FPKM	baseMean	baseMeanA	baseMeanB	foldChange	log2FoldChange	pval	padj	Regulation	Chr	Start	End	Strand	GeneSymbol	Description	GO_BP	GO_CC	GO_MF
Lsat_1_v5_gn_8_92820	423	22	3.11	0	0	11.6044	23.2087	0	0	#NAME?	0.000224257	0.0422273	Down	Dovetail_09Sept_Map_inspected_12-07-2015_1_v8_lg_8	134319076	134319498	-	Lsat_1_v5_gn_8_92820	-	-	-	-
Lsat_1_v5_gn_2_78000	661	6	0.54	215	17.75	105.066	6.32965	203.803	32.1981	5.0089	5.60783e-15	4.71656e-11	Ups	Dovetail_09Sept_Map_inspected_12-07-2015_1_v8_lg_2	151541420	151542160	-	Lsat_1_v5_gn_2_78000	-	GO:0006950:response to stress;GO:0009415:response to water;	-	-
Lsat_1_v5_gn_1_129340	541	1	0.11	32	3.23	15.6942	1.05494	30.3334	28.7536	4.84567	0.000275603	0.0489719	Ups	Dovetail_09Sept_Map_inspected_12-07-2015_1_v8_lg_1	212336811	212337351	+	Lsat_1_v5_gn_1_129340	-	-	-	-
Lsat_1_v5_gn_9_34320	1719	3	0.1	44	1.4	22.4366	3.16483	41.7084	13.1787	3.72014	0.000197264	0.0382875	Ups	Dovetail_09Sept_Map_inspected_12-07-2015_1_v8_lg_9	36391354	36400689	+	Lsat_1_v5_gn_9_34320	-	GO:0046274:lignin catabolic process;GO:0055114:oxidation-reduction process;	GO:0048046:apoplast;	GO:0052716:hydroquinone:oxygen oxidoreductase activity;GO:0005507:copper ion binding;
Lsat_1_v5_gn_7_49380	1738	65	2.23	433	13.6	239.51	68.5712	410.449	5.98573	2.58153	1.71964e-10	6.19856e-07	Ups	Dovetail_09Sept_Map_inspected_12-07-2015_1_v8_lg_7	67038221	67039983	-	Lsat_1_v5_gn_7_49380	-	GO:0055114:oxidation-reduction process;	-	GO:0050660:flavin adenine dinucleotide binding;GO:0008762:UDP-N-acetylmuramate dehydrogenase activity;
Lsat_1_v5_gn_4_56281	1124	20	1.06	130	6.31	72.1642	21.0988	123.229	5.84058	2.54611	1.16419e-05	0.00419642	Ups	Dovetail_09Sept_Map_inspected_12-07-2015_1_v8_lg_4	85007682	85009082	-	Lsat_1_v5_gn_4_56281	-	-	-	-
Lsat_1_v5_gn_3_67100	1836	238	7.74	1184	35.2	686.706	251.076	1122.34	4.4701	2.16031	1.35267e-11	6.82613e-08	Ups	Dovetail_09Sept_Map_inspected_12-07-2015_1_v8_lg_3	87951009	87953719	-	Lsat_1_v5_gn_3_67100	-	-	-	-
Lsat_1_v5_gn_8_134041	1435	90	3.75	434	16.51	253.171	94.9448	411.397	4.33301	2.11537	5.0556e-08	6.71384e-05	Ups	Dovetail_09Sept_Map_inspected_12-07-2015_1_v8_lg_8	220265808	220269943	+	Lsat_1_v5_gn_8_134041	-	-	-	-
Lsat_1_v5_gn_4_99501	4683	57	0.73	253	2.95	149.978	60.1317	239.824	3.9883	1.99578	7.18174e-06	0.00307135	Ups	Dovetail_09Sept_Map_inspected_12-07-2015_1_v8_lg_4	167993689	168000481	-	Lsat_1_v5_gn_4_99501	-	-	-	-
Lsat_1_v5_gn_2_86121	1379	107	4.64	435	17.22	262.612	112.879	412.345	3.65299	1.86908	8.74739e-07	0.000552121	Ups	Dovetail_09Sept_Map_inspected_12-07-2015_1_v8_lg_2	165024096	165026362	+	Lsat_1_v5_gn_2_86121	-	-	-	-
Lsat_1_v5_gn_9_111061	2013	79	2.34	319	8.65	192.863	83.3404	302.386	3.62833	1.8593	6.16809e-06	0.00277917	Ups	Dovetail_09Sept_Map_inspected_12-07-2015_1_v8_lg_9	179423529	179426258	+	Lsat_1_v5_gn_9_111061	-	-	-	-
Lsat_1_v5_gn_8_102821	1091	2306	126.27	8319	416.19	5159.22	2432.7	7885.74	3.24156	1.69669	8.73643e-08	0.000110219	Ups	Dovetail_09Sept_Map_inspected_12-07-2015_1_v8_lg_8	152756000	152758204	+	Lsat_1_v5_gn_8_102821	-	-	-	-
Lsat_1_v5_gn_4_171761	1088	84	4.61	297	14.9	185.074	88.6152	281.532	3.17702	1.66767	5.23983e-05	0.013917	Ups	Dovetail_09Sept_Map_inspected_12-07-2015_1_v8_lg_4	348791676	348794445	-	Lsat_1_v5_gn_4_171761	-	-	-	-
Lsat_1_v5_gn_7_12661	544	290	31.85	980	98.33	617.447	305.933	928.961	3.03648	1.6024	4.25827e-07	0.000336245	Ups	Dovetail_09Sept_Map_inspected_12-07-2015_1_v8_lg_7	14590333	14591175	+	Lsat_1_v5_gn_7_12661	-	-	-	-
Lsat_1_v5_gn_2_8920	1062	135	7.59	434	22.31	276.907	142.417	411.397	2.88867	1.53041	3.51365e-05	0.0100746	Ups	Dovetail_09Sept_Map_inspected_12-07-2015_1_v8_lg_2	20742205	20744938	-	Lsat_1_v5_gn_2_8920	-	-	-	-
Lsat_1_v5_gn_5_148001	1116	477	25.53	1521	74.39	972.496	503.207	1441.79	2.86519	1.51863	3.87904e-07	0.000326253	Ups	Dovetail_09Sept_Map_inspected_12-07-2015_1_v8_lg_5	283118336	283119451	+	Lsat_1_v5_gn_5_148001	-	-	-	-
Lsat_1_v5_gn_8_3001	1856	158	5.09	496	14.59	318.424	166.681	470.168	2.82077	1.49609	2.87933e-05	0.00864896	Ups	Dovetail_09Sept_Map_inspected_12-07-2015_1_v8_lg_8	4127989	4131024	-	Lsat_1_v5_gn_8_3001	-	-	-	-
Lsat_1_v5_gn_2_65820	1830	165	5.39	502	14.97	324.96	174.065	475.855	2.73377	1.45089	4.47283e-05	0.012402	Ups	Dovetail_09Sept_Map_inspected_12-07-2015_1_v8_lg_2	139312137	139315260	-	Lsat_1_v5_gn_2_65820	-	-	-	-
Lsat_1_v5_gn_9_86541	2608	158	3.62	476	9.96	308.945	166.681	451.21	2.70703	1.43671	6.3908e-05	0.0161253	Ups	Dovetail_09Sept_Map_inspected_12-07-2015_1_v8_lg_9	133967208	133970721	+	Lsat_1_v5_gn_9_86541	-	-	-	-
Lsat_1_v5_gn_5_168420	531	109	12.26	326	33.51	212.005	114.989	309.022	2.68741	1.42622	0.000292477	0.0498634	Ups	Dovetail_09Sept_Map_inspected_12-07-2015_1_v8_lg_5	309468688	309469287	+	Lsat_1_v5_gn_5_168420	-	-	-	-
Lsat_1_v5_gn_4_170140	1094	121	6.61	360	17.96	234.449	127.648	341.251	2.67337	1.41866	0.000217447	0.0412528	Ups	Dovetail_09Sept_Map_inspected_12-07-2015_1_v8_lg_4	344595030	344597744	+	Lsat_1_v5_gn_4_170140	-	-	-	-
Lsat_1_v5_gn_9_122941	2217	744	20.05	2197	54.09	1433.73	784.877	2082.58	2.65338	1.40783	1.70167e-06	0.000975828	Ups	Dovetail_09Sept_Map_inspected_12-07-2015_1_v8_lg_9	198989825	198992697	-	Lsat_1_v5_gn_9_122941	-	-	-	-
Lsat_1_v5_gn_9_24061	1664	344	12.35	997	32.7	653.988	362.9	945.075	2.60423	1.38086	9.59546e-06	0.00384306	Ups	Dovetail_09Sept_Map_inspected_12-07-2015_1_v8_lg_9	28290618	28292547	-	Lsat_1_v5_gn_9_24061	-	-	-	-
Lsat_1_v5_gn_6_96800	1143	1127	58.9	3253	155.34	2136.25	1188.92	3083.58	2.5936	1.37496	3.06336e-06	0.00168032	Ups	Dovetail_09Sept_Map_inspected_12-07-2015_1_v8_lg_6	158509178	158510999	-	Lsat_1_v5_gn_6_96800	-	GO:0055114:oxidation-reduction process;	-	GO:0016491:oxidoreductase activity;GO:0000166:nucleotide binding;GO:0008270:zinc ion binding;
Lsat_1_v5_gn_4_145441	219	1374	374.8	3940	981.97	2592.15	1449.49	3734.8	2.57663	1.36549	4.11719e-06	0.00216427	Ups	Dovetail_09Sept_Map_inspected_12-07-2015_1_v8_lg_4	285806287	285806518	-	Lsat_1_v5_gn_4_145441	-	-	-	-
Lsat_1_v5_gn_4_99801	300	917	182.6	2562	466.13	1697.98	967.382	2428.57	2.51045	1.32795	5.9725e-06	0.00273996	Ups	Dovetail_09Sept_Map_inspected_12-07-2015_1_v8_lg_4	166944357	166944735	+	Lsat_1_v5_gn_4_99801	-	-	-	-
Lsat_1_v5_gn_8_4241	493	155	18.78	433	47.94	286.983	163.516	410.449	2.51014	1.32777	0.000266534	0.0487332	Ups	Dovetail_09Sept_Map_inspected_12-07-2015_1_v8_lg_8	5070733	5071276	+	Lsat_1_v5_gn_8_4241	-	-	-	-
Lsat_1_v5_gn_8_28160	2356	465	11.79	1274	29.51	849.099	490.548	1207.65	2.46184	1.29973	1.53466e-05	0.00537812	Ups	Dovetail_09Sept_Map_inspected_12-07-2015_1_v8_lg_8	35585509	35590443	-	Lsat_1_v5_gn_8_28160	-	-	-	-
Lsat_1_v5_gn_8_5061	1271	867	40.75	2324	99.8	1558.8	914.635	2202.96	2.40857	1.26818	1.48824e-05	0.00528889	Ups	Dovetail_09Sept_Map_inspected_12-07-2015_1_v8_lg_8	6880190	6881829	+	Lsat_1_v5_gn_8_5061	-	-	-	-
Lsat_1_v5_gn_1_56901	2223	2049	55.06	5055	124.12	3476.65	2161.58	4791.73	2.21678	1.14846	0.000138119	0.0292858	Ups	Dovetail_09Sept_Map_inspected_12-07-2015_1_v8_lg_1	66434336	66439632	+	Lsat_1_v5_gn_1_56901	-	-	GO:0005886:plasma membrane;	GO:0005524:ATP binding;GO:0016887:ATPase activity;
Lsat_1_v5_gn_2_23920	652	738	67.62	1810	151.52	1247.14	778.547	1715.73	2.20376	1.13997	9.8746e-05	0.0220492	Ups	Dovetail_09Sept_Map_inspected_12-07-2015_1_v8_lg_2	50346097	50346748	-	Lsat_1_v5_gn_2_23920	-	-	-	-
Lsat_1_v5_gn_4_156941	855	414	28.93	1001	63.9	692.807	436.746	948.867	2.17258	1.11941	0.000270717	0.0487909	Ups	Dovetail_09Sept_Map_inspected_12-07-2015_1_v8_lg_4	310241290	310242144	-	Lsat_1_v5_gn_4_156941	-	-	-	-
Lsat_1_v5_gn_2_8861	705	519	43.98	1246	96.47	864.311	547.515	1181.11	2.15721	1.10917	0.00020378	0.0392503	Ups	Dovetail_09Sept_Map_inspected_12-07-2015_1_v8_lg_2	19376544	19379223	-	Lsat_1_v5_gn_2_8861	-	-	-	-
Lsat_1_v5_gn_4_70901	2561	1012	23.61	2398	51.11	1670.36	1067.6	2273.11	2.12917	1.09029	0.000184679	0.0366915	Ups	Dovetail_09Sept_Map_inspected_12-07-2015_1_v8_lg_4	109636258	109639317	-	Lsat_1_v5_gn_4_70901	-	-	-	-
Lsat_1_v5_gn_9_37560	1102	1717	93.08	911	45.12	1337.45	1811.34	863.554	0.47675	-1.0687	0.000248325	0.0457352	Down	Dovetail_09Sept_Map_inspected_12-07-2015_1_v8_lg_9	39967748	39968849	+	Lsat_1_v5_gn_9_37560	-	GO:0009738:abscisic acid-activated signaling pathway;	-	-
Lsat_1_v5_gn_7_30060	1863	1140	36.56	601	17.61	886.167	1202.63	569.699	0.47371	-1.07793	0.000289673	0.0497213	Down	Dovetail_09Sept_Map_inspected_12-07-2015_1_v8_lg_7	43914128	43915990	+	Lsat_1_v5_gn_7_30060	-	GO:0055114:oxidation-reduction process;	-	GO:0020037:heme binding;GO:0004497:monooxygenase activity;GO:0005506:iron ion binding;GO:0009055:electron carrier activity;GO:0000249:C-22 sterol desaturase activity;
Lsat_1_v5_gn_6_83320	2442	1149	28.11	605	13.52	892.81	1212.13	573.491	0.473127	-1.0797	0.000280711	0.0491868	Down	Dovetail_09Sept_Map_inspected_12-07-2015_1_v8_lg_6	138215413	138219587	-	Lsat_1_v5_gn_6_83320	-	-	-	-
Lsat_1_v5_gn_7_45481	2048	1213	35.38	635	16.92	940.787	1279.64	601.929	0.470387	-1.08808	0.000237708	0.0444285	Down	Dovetail_09Sept_Map_inspected_12-07-2015_1_v8_lg_7	59973776	59978852	+	Lsat_1_v5_gn_7_45481	-	-	-	-
Lsat_1_v5_gn_5_107420	2422	1530	37.74	800	18.03	1186.2	1614.06	758.335	0.46983	-1.08979	0.000195162	0.0381731	Down	Dovetail_09Sept_Map_inspected_12-07-2015_1_v8_lg_5	226032533	226035772	-	Lsat_1_v5_gn_5_107420	-	-	GO:0005856:cytoskeleton;GO:0005737:cytoplasm;	GO:0005524:ATP binding;
Lsat_1_v5_gn_5_190740	1111	1784	95.93	926	45.49	1379.9	1882.02	877.773	0.4664	-1.10036	0.000162183	0.0331008	Down	Dovetail_09Sept_Map_inspected_12-07-2015_1_v8_lg_5	338858612	338864860	+	Lsat_1_v5_gn_5_190740	-	-	-	-
Lsat_1_v5_gn_2_102941	801	3649	272.15	1868	127.29	2810.1	3849.48	1770.71	0.459987	-1.12033	0.000151778	0.0316502	Down	Dovetail_09Sept_Map_inspected_12-07-2015_1_v8_lg_2	181278497	181279297	+	Lsat_1_v5_gn_2_102941	-	GO:0009765:photosynthesis, light harvesting;	GO:0016020:membrane;GO:0009507:chloroplast;	GO:0046872:metal ion binding;
Lsat_1_v5_gn_1_89661	1615	2030	75.09	1035	34.98	1561.31	2141.53	981.096	0.458128	-1.12618	0.000112632	0.0247124	Down	Dovetail_09Sept_Map_inspected_12-07-2015_1_v8_lg_1	111224493	111226609	+	Lsat_1_v5_gn_1_89661	-	GO:0008152:metabolic process;	-	GO:0016758:transferase activity, transferring hexosyl groups;
Lsat_1_v5_gn_5_100940	1869	1267	40.5	635	18.54	969.27	1336.61	601.929	0.450339	-1.15092	0.000100227	0.0221836	Down	Dovetail_09Sept_Map_inspected_12-07-2015_1_v8_lg_5	218273594	218278702	-	Lsat_1_v5_gn_5_100940	-	-	-	-
Lsat_1_v5_gn_9_112181	959	1475	91.88	739	42.06	1128.28	1556.04	700.512	0.450189	-1.1514	8.72202e-05	0.0200067	Down	Dovetail_09Sept_Map_inspected_12-07-2015_1_v8_lg_9	182223872	182225998	-	Lsat_1_v5_gn_9_112181	-	-	-	-
Lsat_1_v5_gn_8_116340	1837	1304	42.41	649	19.28	995.422	1375.64	615.2	0.447208	-1.16098	8.49334e-05	0.0196609	Down	Dovetail_09Sept_Map_inspected_12-07-2015_1_v8_lg_8	178016363	178019730	+	Lsat_1_v5_gn_8_116340	-	GO:0045338:farnesyl diphosphate metabolic process;GO:0016114:terpenoid biosynthetic process;	-	GO:0000287:magnesium ion binding;GO:0034005:germacrene-A synthase activity;
Lsat_1_v5_gn_7_93900	546	2574	281.63	1269	126.86	1959.17	2715.42	1202.91	0.442992	-1.17465	5.90521e-05	0.0150592	Down	Dovetail_09Sept_Map_inspected_12-07-2015_1_v8_lg_7	161674807	161675429	+	Lsat_1_v5_gn_7_93900	-	-	-	-
Lsat_1_v5_gn_5_139561	1014	6852	403.68	3365	181.13	5209.11	7228.46	3189.75	0.441276	-1.18025	0.00016267	0.0331008	Down	Dovetail_09Sept_Map_inspected_12-07-2015_1_v8_lg_5	268433352	268434698	-	Lsat_1_v5_gn_5_139561	-	-	-	-
Lsat_1_v5_gn_3_36200	1473	815	33.05	397	14.71	618.051	859.778	376.324	0.437699	-1.19199	0.000134856	0.0288768	Down	Dovetail_09Sept_Map_inspected_12-07-2015_1_v8_lg_3	47274937	47277862	-	Lsat_1_v5_gn_3_36200	-	GO:0055114:oxidation-reduction process;	-	GO:0016491:oxidoreductase activity;
Lsat_1_v5_gn_2_112901	2787	5084	108.98	2464	48.26	3849.5	5363.33	2335.67	0.43549	-1.19929	7.95864e-05	0.0189446	Down	Dovetail_09Sept_Map_inspected_12-07-2015_1_v8_lg_2	191096567	191100955	+	Lsat_1_v5_gn_2_112901	-	-	-	-
Lsat_1_v5_gn_2_121440	1188	1393	70.05	675	31.01	1054.69	1469.53	639.845	0.435407	-1.19956	4.69159e-05	0.0125934	Down	Dovetail_09Sept_Map_inspected_12-07-2015_1_v8_lg_2	200680269	200681715	+	Lsat_1_v5_gn_2_121440	-	-	-	-
Lsat_1_v5_gn_4_28860	798	3823	286.19	1852	126.67	2894.3	4033.04	1755.55	0.435291	-1.19995	5.69904e-05	0.0148246	Down	Dovetail_09Sept_Map_inspected_12-07-2015_1_v8_lg_4	43393699	43394496	-	Lsat_1_v5_gn_4_28860	-	-	-	-
Lsat_1_v5_gn_6_85540	4302	6865	95.33	3322	42.15	5195.58	7242.18	3148.99	0.434812	-1.20154	0.000123942	0.0269594	Down	Dovetail_09Sept_Map_inspected_12-07-2015_1_v8_lg_6	141254601	141262158	+	Lsat_1_v5_gn_6_85540	-	-	-	-
Lsat_1_v5_gn_3_1361	518	7338	846.27	3544	373.43	5550.3	7741.17	3359.43	0.433969	-1.20434	0.000135045	0.0288768	Down	Dovetail_09Sept_Map_inspected_12-07-2015_1_v8_lg_3	2829203	2829997	-	Lsat_1_v5_gn_3_1361	-	-	-	-
Lsat_1_v5_gn_1_105220	1444	4772	197.42	2300	86.94	3607.2	5034.18	2180.21	0.433082	-1.20729	6.56064e-05	0.0163899	Down	Dovetail_09Sept_Map_inspected_12-07-2015_1_v8_lg_1	148298331	148299947	+	Lsat_1_v5_gn_1_105220	-	-	-	-
Lsat_1_v5_gn_5_119940	2104	5928	168.31	2849	73.91	4477.16	6253.7	2700.62	0.431844	-1.21142	8.47709e-05	0.0196609	Down	Dovetail_09Sept_Map_inspected_12-07-2015_1_v8_lg_5	243564524	243566627	-	Lsat_1_v5_gn_5_119940	-	GO:0008152:metabolic process;	-	GO:0016491:oxidoreductase activity;
Lsat_1_v5_gn_2_5961	2822	4615	97.7	2191	42.38	3472.72	4868.56	2076.89	0.426593	-1.22907	4.64053e-05	0.0125903	Down	Dovetail_09Sept_Map_inspected_12-07-2015_1_v8_lg_2	12586400	12590096	+	Lsat_1_v5_gn_2_5961	-	-	-	-
Lsat_1_v5_gn_8_63761	1507	1607	63.7	762	27.6	1208.8	1695.29	722.314	0.426071	-1.23084	2.72295e-05	0.00848216	Down	Dovetail_09Sept_Map_inspected_12-07-2015_1_v8_lg_8	91146229	91148647	-	Lsat_1_v5_gn_8_63761	-	-	-	GO:0016747:transferase activity, transferring acyl groups other than amino-acyl groups;
Lsat_1_v5_gn_1_62140	681	7074	620.55	3319	266.01	5304.4	7462.66	3146.14	0.421585	-1.24611	7.27937e-05	0.0174927	Down	Dovetail_09Sept_Map_inspected_12-07-2015_1_v8_lg_1	71526834	71528228	+	Lsat_1_v5_gn_1_62140	-	-	-	-
Lsat_1_v5_gn_8_51000	1165	1210	62.05	567	26.56	906.975	1276.48	537.47	0.421056	-1.24791	2.82878e-05	0.00864896	Down	Dovetail_09Sept_Map_inspected_12-07-2015_1_v8_lg_8	70957831	70959348	+	Lsat_1_v5_gn_8_51000	-	-	-	-
Lsat_1_v5_gn_8_59160	1872	1788	57.06	833	24.29	1337.93	1886.24	789.617	0.41862	-1.25629	1.80078e-05	0.00597858	Down	Dovetail_09Sept_Map_inspected_12-07-2015_1_v8_lg_8	83218180	83221295	+	Lsat_1_v5_gn_8_59160	-	-	-	-
Lsat_1_v5_gn_5_21660	685	722	62.97	336	26.77	540.085	761.668	318.501	0.418162	-1.25787	8.1736e-05	0.0192744	Down	Dovetail_09Sept_Map_inspected_12-07-2015_1_v8_lg_5	44574248	44575062	+	Lsat_1_v5_gn_5_21660	-	-	-	-
Lsat_1_v5_gn_4_28800	798	4787	358.36	2218	151.71	3576.25	5050.01	2102.48	0.416333	-1.26419	2.95499e-05	0.00866979	Down	Dovetail_09Sept_Map_inspected_12-07-2015_1_v8_lg_4	43474030	43476835	-	Lsat_1_v5_gn_4_28800	-	-	-	-
Lsat_1_v5_gn_9_113301	1713	15845	552.58	7294	232.41	11814.8	16715.6	6914.12	0.413634	-1.27357	0.000269597	0.0487909	Down	Dovetail_09Sept_Map_inspected_12-07-2015_1_v8_lg_9	184495216	184497547	+	Lsat_1_v5_gn_9_113301	-	GO:0051258:protein polymerization;GO:0007017:microtubule-based process;	GO:0005874:microtubule;GO:0005737:cytoplasm;	GO:0003924:GTPase activity;GO:0005200:structural constituent of cytoskeleton;GO:0005525:GTP binding;
Lsat_1_v5_gn_9_103641	1354	1987	87.67	907	36.56	1477.97	2096.17	859.763	0.410159	-1.28575	1.13014e-05	0.00413269	Down	Dovetail_09Sept_Map_inspected_12-07-2015_1_v8_lg_9	166695629	166696982	-	Lsat_1_v5_gn_9_103641	-	-	-	-
Lsat_1_v5_gn_9_46580	2011	6681	198.47	3042	82.56	4965.82	7048.07	2883.57	0.409129	-1.28937	3.61047e-05	0.0102359	Down	Dovetail_09Sept_Map_inspected_12-07-2015_1_v8_lg_9	50742885	50748571	-	Lsat_1_v5_gn_9_46580	-	-	-	-
Lsat_1_v5_gn_7_84860	1726	657	22.74	299	9.46	488.262	693.097	283.428	0.408929	-1.29008	7.24394e-05	0.0174927	Down	Dovetail_09Sept_Map_inspected_12-07-2015_1_v8_lg_7	141836887	141840661	+	Lsat_1_v5_gn_7_84860	-	-	-	-
Lsat_1_v5_gn_4_162200	342	2137	373.28	970	154.81	1586.95	2254.41	919.482	0.407859	-1.29386	9.92381e-06	0.00391246	Down	Dovetail_09Sept_Map_inspected_12-07-2015_1_v8_lg_4	326193975	326194395	+	Lsat_1_v5_gn_4_162200	-	-	-	-
Lsat_1_v5_gn_6_46781	1088	479	26.3	217	10.89	355.508	505.317	205.698	0.407068	-1.29666	0.000177931	0.0356314	Down	Dovetail_09Sept_Map_inspected_12-07-2015_1_v8_lg_6	63018508	63019595	+	Lsat_1_v5_gn_6_46781	-	-	-	-
Lsat_1_v5_gn_3_124841	1587	3180	119.7	1429	49.15	2354.65	3354.72	1354.58	0.403783	-1.30835	9.08149e-06	0.00369587	Down	Dovetail_09Sept_Map_inspected_12-07-2015_1_v8_lg_3	210932836	210934422	+	Lsat_1_v5_gn_3_124841	-	-	-	-
Lsat_1_v5_gn_7_103561	1565	3204	122.3	1421	49.56	2363.51	3380.04	1346.99	0.398515	-1.3273	6.81253e-06	0.00299882	Down	Dovetail_09Sept_Map_inspected_12-07-2015_1_v8_lg_7	172666795	172668359	+	Lsat_1_v5_gn_7_103561	-	-	-	-
Lsat_1_v5_gn_4_105781	857	700	48.8	310	19.74	516.157	738.46	293.855	0.39793	-1.32941	3.72603e-05	0.0104461	Down	Dovetail_09Sept_Map_inspected_12-07-2015_1_v8_lg_4	179033178	179034257	-	Lsat_1_v5_gn_4_105781	-	-	-	-
Lsat_1_v5_gn_6_19421	899	443	29.44	195	11.84	326.092	467.339	184.844	0.395525	-1.33816	0.000149436	0.0314214	Down	Dovetail_09Sept_Map_inspected_12-07-2015_1_v8_lg_6	24355083	24355981	-	Lsat_1_v5_gn_6_19421	-	-	-	-
Lsat_1_v5_gn_6_24520	1875	6936	220.99	3049	88.76	5103.64	7317.08	2890.21	0.394994	-1.3401	1.90928e-05	0.00617626	Down	Dovetail_09Sept_Map_inspected_12-07-2015_1_v8_lg_6	35375900	35377892	-	Lsat_1_v5_gn_6_24520	-	-	-	-
Lsat_1_v5_gn_8_86420	1348	881	39.04	386	15.63	647.65	929.404	365.897	0.39369	-1.34487	1.57925e-05	0.00545858	Down	Dovetail_09Sept_Map_inspected_12-07-2015_1_v8_lg_8	124645520	124648318	-	Lsat_1_v5_gn_8_86420	-	-	GO:0005634:nucleus;	-
Lsat_1_v5_gn_6_84061	2168	2115	58.28	925	23.29	1554.01	2231.2	876.825	0.392983	-1.34746	4.32358e-06	0.00222638	Down	Dovetail_09Sept_Map_inspected_12-07-2015_1_v8_lg_6	139057394	139061584	-	Lsat_1_v5_gn_6_84061	-	-	-	-
Lsat_1_v5_gn_4_28820	798	1156	86.54	504	34.47	848.632	1219.51	477.751	0.391756	-1.35197	6.89329e-06	0.00299882	Down	Dovetail_09Sept_Map_inspected_12-07-2015_1_v8_lg_4	43458606	43459403	-	Lsat_1_v5_gn_4_28820	-	-	-	-
Lsat_1_v5_gn_3_221	685	11074	965.77	4818	383.9	8124.75	11682.4	4567.07	0.390935	-1.355	4.62341e-05	0.0125903	Down	Dovetail_09Sept_Map_inspected_12-07-2015_1_v8_lg_3	2419522	2420206	+	Lsat_1_v5_gn_3_221	-	-	-	-
Lsat_1_v5_gn_9_113941	1906	1278	40.06	556	15.92	937.63	1348.22	527.043	0.390919	-1.35506	5.49485e-06	0.00261722	Down	Dovetail_09Sept_Map_inspected_12-07-2015_1_v8_lg_9	184827409	184831047	+	Lsat_1_v5_gn_9_113941	-	-	-	-
Lsat_1_v5_gn_5_86540	1570	372	14.15	161	5.6	272.527	392.439	152.615	0.388889	-1.36257	0.000213071	0.0407288	Down	Dovetail_09Sept_Map_inspected_12-07-2015_1_v8_lg_5	193485054	193486798	+	Lsat_1_v5_gn_5_86540	-	-	-	-
Lsat_1_v5_gn_8_4341	2048	1224	35.7	529	14.1	896.349	1291.25	501.449	0.388344	-1.36459	5.13151e-06	0.00253879	Down	Dovetail_09Sept_Map_inspected_12-07-2015_1_v8_lg_8	5419798	5422579	-	Lsat_1_v5_gn_8_4341	-	-	-	-
Lsat_1_v5_gn_4_116980	1534	1246	48.52	536	19.07	911.271	1314.46	508.085	0.386535	-1.37133	4.49274e-06	0.00226722	Down	Dovetail_09Sept_Map_inspected_12-07-2015_1_v8_lg_4	206532180	206535615	+	Lsat_1_v5_gn_4_116980	-	-	-	-
Lsat_1_v5_gn_9_50321	429	437	60.85	186	23.66	318.661	461.01	176.313	0.38245	-1.38666	9.48153e-05	0.0213605	Down	Dovetail_09Sept_Map_inspected_12-07-2015_1_v8_lg_9	54222866	54225407	-	Lsat_1_v5_gn_9_50321	-	-	-	GO:0020037:heme binding;GO:0046872:metal ion binding;
Lsat_1_v5_gn_5_121740	867	793	54.64	336	21.15	577.535	836.569	318.501	0.380723	-1.39319	1.12113e-05	0.00413269	Down	Dovetail_09Sept_Map_inspected_12-07-2015_1_v8_lg_5	246353042	246354999	-	Lsat_1_v5_gn_5_121740	-	-	-	-
Lsat_1_v5_gn_1_66200	1744	365	12.5	154	4.82	265.517	385.054	145.98	0.379115	-1.39929	0.000160072	0.0331008	Down	Dovetail_09Sept_Map_inspected_12-07-2015_1_v8_lg_1	78677337	78679193	+	Lsat_1_v5_gn_1_66200	-	-	-	-
Lsat_1_v5_gn_2_63701	839	358	25.49	151	9.82	260.403	377.669	143.136	0.378998	-1.39974	0.000170925	0.0345023	Down	Dovetail_09Sept_Map_inspected_12-07-2015_1_v8_lg_2	134176597	134177785	+	Lsat_1_v5_gn_2_63701	-	GO:0019464:glycine decarboxylation via glycine cleavage system;	GO:0005960:glycine cleavage complex;GO:0005739:mitochondrion;	-
Lsat_1_v5_gn_4_74061	899	570	37.88	233	14.15	411.091	601.317	220.865	0.367302	-1.44496	1.8376e-05	0.00602161	Down	Dovetail_09Sept_Map_inspected_12-07-2015_1_v8_lg_4	117553889	117555202	-	Lsat_1_v5_gn_4_74061	-	GO:0035556:intracellular signal transduction;GO:0000160:phosphorelay signal transduction system;GO:0016310:phosphorylation;GO:0006355:regulation of transcription, DNA-templated;	-	GO:0016301:kinase activity;GO:0000156:phosphorelay response regulator activity;
Lsat_1_v5_gn_7_107201	2051	502	14.62	205	5.46	361.952	529.581	194.323	0.366938	-1.44639	2.94369e-05	0.00866979	Down	Dovetail_09Sept_Map_inspected_12-07-2015_1_v8_lg_7	181491770	181494639	+	Lsat_1_v5_gn_7_107201	-	GO:0009826:unidimensional cell growth;GO:0009734:auxin-activated signaling pathway;	GO:0009507:chloroplast;	GO:0010279:indole-3-acetic acid amido synthetase activity;
Lsat_1_v5_gn_5_124680	1280	2257	105.34	919	39.19	1626.07	2381	871.138	0.36587	-1.4506	8.09291e-07	0.000551893	Down	Dovetail_09Sept_Map_inspected_12-07-2015_1_v8_lg_5	248324001	248327543	-	Lsat_1_v5_gn_5_124680	-	-	-	-
Lsat_1_v5_gn_3_33121	879	8663	588.76	3494	216.96	6225.5	9138.97	3312.03	0.362408	-1.46432	5.4975e-06	0.00261722	Down	Dovetail_09Sept_Map_inspected_12-07-2015_1_v8_lg_3	42825991	42827051	-	Lsat_1_v5_gn_3_33121	-	GO:0006073:cellular glucan metabolic process;	GO:0048046:apoplast;GO:0005618:cell wall;	GO:0004553:hydrolase activity, hydrolyzing O-glycosyl compounds;GO:0016762:xyloglucan:xyloglucosyl transferase activity;
Lsat_1_v5_gn_6_101520	4436	1029	13.86	412	5.07	738.039	1085.54	390.543	0.35977	-1.47485	1.46363e-06	0.000879293	Down	Dovetail_09Sept_Map_inspected_12-07-2015_1_v8_lg_6	166134219	166139640	+	Lsat_1_v5_gn_6_101520	-	GO:0009409:response to cold;GO:0010229:inflorescence development;GO:0009637:response to blue light;GO:0010378:temperature compensation of the circadian clock;GO:0010218:response to far red light;GO:0042542:response to hydrogen peroxide;GO:0080167:response to karrikin;GO:0048578:positive regulation of long-day photoperiodism, flowering;	GO:0005654:nucleoplasm;	-
Lsat_1_v5_gn_6_104261	351	1727	293.93	669	104.03	1228.02	1821.89	634.158	0.348078	-1.52252	2.60978e-07	0.000253269	Down	Dovetail_09Sept_Map_inspected_12-07-2015_1_v8_lg_6	171232482	171232832	+	Lsat_1_v5_gn_6_104261	-	-	-	-
Lsat_1_v5_gn_6_6441	1567	5202	198.32	2012	70.08	3697.51	5487.81	1907.21	0.347536	-1.52476	6.01671e-07	0.000424164	Down	Dovetail_09Sept_Map_inspected_12-07-2015_1_v8_lg_6	9124164	9125958	+	Lsat_1_v5_gn_6_6441	-	GO:0051258:protein polymerization;GO:0007017:microtubule-based process;	GO:0005874:microtubule;GO:0005737:cytoplasm;	GO:0003924:GTPase activity;GO:0005200:structural constituent of cytoskeleton;GO:0005525:GTP binding;
Lsat_1_v5_gn_1_2860	955	497	31.09	191	10.92	352.679	524.306	181.053	0.345318	-1.534	1.11608e-05	0.00413269	Down	Dovetail_09Sept_Map_inspected_12-07-2015_1_v8_lg_1	3643085	3644302	+	Lsat_1_v5_gn_1_2860	-	-	-	-
Lsat_1_v5_gn_2_83561	721	2861	237.05	1093	82.74	2027.13	3018.19	1036.08	0.343277	-1.54255	1.78908e-07	0.00019627	Down	Dovetail_09Sept_Map_inspected_12-07-2015_1_v8_lg_2	160175784	160177520	+	Lsat_1_v5_gn_2_83561	-	-	-	-
Lsat_1_v5_gn_9_63620	1161	324	16.67	123	5.78	229.198	341.801	116.594	0.341116	-1.55166	5.9086e-05	0.0150592	Down	Dovetail_09Sept_Map_inspected_12-07-2015_1_v8_lg_9	79249000	79250423	-	Lsat_1_v5_gn_9_63620	-	-	-	-
Lsat_1_v5_gn_3_55200	658	241	21.88	91	7.55	170.251	254.241	86.2606	0.339287	-1.55942	0.000192623	0.0379708	Down	Dovetail_09Sept_Map_inspected_12-07-2015_1_v8_lg_3	70714728	70715537	-	Lsat_1_v5_gn_3_55200	-	-	-	-
Lsat_1_v5_gn_3_89440	987	2277	137.82	853	47.17	1605.34	2402.1	808.575	0.336611	-1.57084	1.02072e-07	0.000117068	Down	Dovetail_09Sept_Map_inspected_12-07-2015_1_v8_lg_3	134803471	134804871	-	Lsat_1_v5_gn_3_89440	-	GO:0032259:methylation;	-	GO:0008171:O-methyltransferase activity;
Lsat_1_v5_gn_3_13220	1665	2102	75.42	787	25.8	1481.75	2217.49	746.012	0.336422	-1.57166	1.01677e-07	0.000117068	Down	Dovetail_09Sept_Map_inspected_12-07-2015_1_v8_lg_3	20454718	20456628	-	Lsat_1_v5_gn_3_13220	-	-	-	-
Lsat_1_v5_gn_6_34321	1132	214	11.29	80	3.86	150.796	225.758	75.8335	0.335907	-1.57387	0.000279442	0.0491868	Down	Dovetail_09Sept_Map_inspected_12-07-2015_1_v8_lg_6	46359024	46361107	-	Lsat_1_v5_gn_6_34321	-	-	-	-
Lsat_1_v5_gn_8_89001	1990	891	26.75	329	9.02	625.909	939.954	311.865	0.331788	-1.59167	4.51559e-07	0.000345265	Down	Dovetail_09Sept_Map_inspected_12-07-2015_1_v8_lg_8	128485309	128489770	-	Lsat_1_v5_gn_8_89001	-	-	-	-
Lsat_1_v5_gn_8_88181	1395	431	18.46	159	6.22	302.7	454.68	150.719	0.331484	-1.59299	1.0765e-05	0.00413269	Down	Dovetail_09Sept_Map_inspected_12-07-2015_1_v8_lg_8	126237455	126238849	-	Lsat_1_v5_gn_8_88181	-	-	-	-
Lsat_1_v5_gn_8_122761	1152	769	39.88	280	13.27	538.334	811.251	265.417	0.327171	-1.61188	6.0518e-07	0.000424164	Down	Dovetail_09Sept_Map_inspected_12-07-2015_1_v8_lg_8	188540774	188542846	-	Lsat_1_v5_gn_8_122761	-	-	-	-
Lsat_1_v5_gn_6_401	711	7199	604.87	2621	201.21	5039.51	7594.53	2484.5	0.327143	-1.61201	3.19075e-07	0.000277617	Down	Dovetail_09Sept_Map_inspected_12-07-2015_1_v8_lg_6	2767328	2768098	-	Lsat_1_v5_gn_6_401	-	-	-	-
Lsat_1_v5_gn_3_47880	1056	196	11.09	71	3.67	137.035	206.769	67.3023	0.325495	-1.61929	0.000284584	0.0494491	Down	Dovetail_09Sept_Map_inspected_12-07-2015_1_v8_lg_3	62091778	62093160	+	Lsat_1_v5_gn_3_47880	-	-	-	-
Lsat_1_v5_gn_5_3340	2664	2725	61.11	981	20.1	1902.31	2874.72	929.909	0.323478	-1.62826	3.76287e-08	5.2747e-05	Down	Dovetail_09Sept_Map_inspected_12-07-2015_1_v8_lg_5	5515588	5519503	-	Lsat_1_v5_gn_5_3340	-	-	-	-
Lsat_1_v5_gn_5_83461	773	265	20.48	95	6.71	184.806	279.56	90.0523	0.322122	-1.63432	6.74083e-05	0.0165131	Down	Dovetail_09Sept_Map_inspected_12-07-2015_1_v8_lg_5	186865974	186870587	-	Lsat_1_v5_gn_5_83461	-	-	-	GO:0046983:protein dimerization activity;GO:0003723:RNA binding;
Lsat_1_v5_gn_8_10000	1143	655	34.23	234	11.17	456.4	690.987	221.813	0.321009	-1.63931	8.43408e-07	0.000552121	Down	Dovetail_09Sept_Map_inspected_12-07-2015_1_v8_lg_8	13527644	13529472	-	Lsat_1_v5_gn_8_10000	-	-	-	-
Lsat_1_v5_gn_2_84540	490	551	67.18	196	21.83	383.533	581.273	185.792	0.31963	-1.64553	1.77872e-06	0.000997347	Down	Dovetail_09Sept_Map_inspected_12-07-2015_1_v8_lg_2	160409686	160410384	+	Lsat_1_v5_gn_2_84540	-	-	-	-
Lsat_1_v5_gn_7_38701	2700	221	4.89	76	1.54	152.592	233.142	72.0419	0.309004	-1.6943	9.38643e-05	0.0213368	Down	Dovetail_09Sept_Map_inspected_12-07-2015_1_v8_lg_7	53500912	53508405	+	Lsat_1_v5_gn_7_38701	-	-	-	-
Lsat_1_v5_gn_3_36141	1375	234	10.17	80	3.18	161.345	246.856	75.8335	0.307197	-1.70276	6.68891e-05	0.0165131	Down	Dovetail_09Sept_Map_inspected_12-07-2015_1_v8_lg_3	47381713	47383087	+	Lsat_1_v5_gn_3_36141	-	-	-	-
Lsat_1_v5_gn_9_44040	1684	276	9.79	94	3.05	190.134	291.164	89.1044	0.306028	-1.70826	2.85028e-05	0.00864896	Down	Dovetail_09Sept_Map_inspected_12-07-2015_1_v8_lg_9	47797683	47800254	-	Lsat_1_v5_gn_9_44040	-	-	-	-
Lsat_1_v5_gn_2_115141	1192	240	12.03	78	3.57	163.562	253.186	73.9377	0.292029	-1.77582	3.1677e-05	0.00918707	Down	Dovetail_09Sept_Map_inspected_12-07-2015_1_v8_lg_2	193730797	193732951	-	Lsat_1_v5_gn_2_115141	-	-	-	-
Lsat_1_v5_gn_6_47340	2223	271	7.28	88	2.16	184.653	285.889	83.4169	0.29178	-1.77705	1.65871e-05	0.00565576	Down	Dovetail_09Sept_Map_inspected_12-07-2015_1_v8_lg_6	66022762	66025046	-	Lsat_1_v5_gn_6_47340	-	-	-	-
Lsat_1_v5_gn_3_17941	1083	1720	94.88	550	27.72	1167.93	1814.5	521.356	0.287327	-1.79923	1.72863e-09	3.63473e-06	Down	Dovetail_09Sept_Map_inspected_12-07-2015_1_v8_lg_3	24262277	24263359	-	Lsat_1_v5_gn_3_17941	-	-	-	-
Lsat_1_v5_gn_4_136401	1607	253	9.41	80	2.72	171.367	266.9	75.8335	0.284127	-1.81539	1.6904e-05	0.00568695	Down	Dovetail_09Sept_Map_inspected_12-07-2015_1_v8_lg_4	263017305	263020686	+	Lsat_1_v5_gn_4_136401	-	GO:0008152:metabolic process;	-	GO:0016787:hydrolase activity;
Lsat_1_v5_gn_4_146041	1023	508	29.67	160	8.54	343.789	535.911	151.667	0.283008	-1.82108	2.89856e-07	0.000261202	Down	Dovetail_09Sept_Map_inspected_12-07-2015_1_v8_lg_4	286667642	286669743	-	Lsat_1_v5_gn_4_146041	-	-	-	-
Lsat_1_v5_gn_9_53021	1627	232	8.52	73	2.45	156.972	244.747	69.1981	0.282734	-1.82248	2.53255e-05	0.00798767	Down	Dovetail_09Sept_Map_inspected_12-07-2015_1_v8_lg_9	61207227	61209154	-	Lsat_1_v5_gn_9_53021	-	GO:0055114:oxidation-reduction process;	-	GO:0005506:iron ion binding;GO:0016706:oxidoreductase activity, acting on paired donors, with incorporation or reduction of molecular oxygen, 2-oxoglutarate as one donor, and incorporation of one atom each of oxygen into both donors;
Lsat_1_v5_gn_3_9560	818	1261	92.09	387	25.82	848.563	1330.28	366.845	0.275765	-1.85849	1.21593e-09	2.78913e-06	Down	Dovetail_09Sept_Map_inspected_12-07-2015_1_v8_lg_3	12864099	12864916	-	Lsat_1_v5_gn_3_9560	-	-	-	-
Lsat_1_v5_gn_3_83381	729	134	10.98	41	3.07	90.1135	141.362	38.8647	0.27493	-1.86287	0.000286128	0.0494491	Down	Dovetail_09Sept_Map_inspected_12-07-2015_1_v8_lg_3	118855445	118856277	-	Lsat_1_v5_gn_3_83381	-	-	-	-
Lsat_1_v5_gn_8_137141	1023	1685	98.4	509	27.16	1130.03	1777.58	482.491	0.271432	-1.88134	3.61709e-10	1.01407e-06	Down	Dovetail_09Sept_Map_inspected_12-07-2015_1_v8_lg_8	222631759	222632781	-	Lsat_1_v5_gn_8_137141	-	-	-	-
Lsat_1_v5_gn_4_152421	1809	255	8.42	77	2.32	171	269.01	72.9898	0.271327	-1.8819	8.84573e-06	0.00365894	Down	Dovetail_09Sept_Map_inspected_12-07-2015_1_v8_lg_4	292801133	292802941	-	Lsat_1_v5_gn_4_152421	-	-	-	GO:0016757:transferase activity, transferring glycosyl groups;
Lsat_1_v5_gn_5_113741	564	3229	342.02	966	93.49	2161.05	3406.41	915.69	0.268814	-1.89532	2.42788e-10	7.65752e-07	Down	Dovetail_09Sept_Map_inspected_12-07-2015_1_v8_lg_5	234883187	234884454	-	Lsat_1_v5_gn_5_113741	-	-	-	-
Lsat_1_v5_gn_5_133201	1706	385	13.48	114	3.65	257.108	406.153	108.063	0.266064	-1.91015	5.38127e-07	0.000399353	Down	Dovetail_09Sept_Map_inspected_12-07-2015_1_v8_lg_5	258676235	258678287	+	Lsat_1_v5_gn_5_133201	-	GO:0055114:oxidation-reduction process;	-	GO:0016706:oxidoreductase activity, acting on paired donors, with incorporation or reduction of molecular oxygen, 2-oxoglutarate as one donor, and incorporation of one atom each of oxygen into both donors;
Lsat_1_v5_gn_8_3921	1993	305	9.14	86	2.36	201.639	321.757	81.521	0.253362	-1.98073	1.11941e-06	0.000688904	Down	Dovetail_09Sept_Map_inspected_12-07-2015_1_v8_lg_8	5270503	5282371	+	Lsat_1_v5_gn_8_3921	-	-	-	-
Lsat_1_v5_gn_2_36340	1801	291	9.65	79	2.39	190.937	306.988	74.8856	0.243936	-2.03542	8.75271e-07	0.000552121	Down	Dovetail_09Sept_Map_inspected_12-07-2015_1_v8_lg_2	83621456	83623256	+	Lsat_1_v5_gn_2_36340	-	-	-	GO:0016614:oxidoreductase activity, acting on CH-OH group of donors;
Lsat_1_v5_gn_8_147781	784	410	31.24	106	7.38	266.503	432.526	100.479	0.232308	-2.10589	3.34039e-08	4.95793e-05	Down	Dovetail_09Sept_Map_inspected_12-07-2015_1_v8_lg_8	250529379	250530828	+	Lsat_1_v5_gn_8_147781	-	-	-	-
Lsat_1_v5_gn_1_6181	2015	305	9.04	77	2.09	197.374	321.757	72.9898	0.226847	-2.14021	2.10671e-07	0.000221485	Down	Dovetail_09Sept_Map_inspected_12-07-2015_1_v8_lg_1	7445575	7447676	+	Lsat_1_v5_gn_1_6181	-	-	-	-
Lsat_1_v5_gn_3_15500	1917	126	3.93	31	0.88	81.1541	132.923	29.3855	0.221072	-2.17741	5.59077e-05	0.0146944	Down	Dovetail_09Sept_Map_inspected_12-07-2015_1_v8_lg_3	20739514	20742100	+	Lsat_1_v5_gn_3_15500	-	-	-	-
Lsat_1_v5_gn_8_131821	1257	261	12.4	62	2.69	167.055	275.34	58.771	0.213449	-2.22804	2.82403e-07	0.000261202	Down	Dovetail_09Sept_Map_inspected_12-07-2015_1_v8_lg_8	211066564	211068084	-	Lsat_1_v5_gn_8_131821	-	-	-	GO:0016740:transferase activity;
Lsat_1_v5_gn_4_46601	662	170	15.34	40	3.3	108.628	179.34	37.9168	0.211424	-2.24179	5.66895e-06	0.00264887	Down	Dovetail_09Sept_Map_inspected_12-07-2015_1_v8_lg_4	67466720	67467381	+	Lsat_1_v5_gn_4_46601	-	-	-	-
Lsat_1_v5_gn_9_63001	654	469	42.84	105	8.76	297.15	494.768	99.5315	0.201168	-2.31353	7.25365e-10	1.83024e-06	Down	Dovetail_09Sept_Map_inspected_12-07-2015_1_v8_lg_9	77636100	77636856	+	Lsat_1_v5_gn_9_63001	-	-	-	-
Lsat_1_v5_gn_6_85720	2367	554	13.98	124	2.86	350.99	584.438	117.542	0.20112	-2.31387	1.5722e-10	6.19856e-07	Down	Dovetail_09Sept_Map_inspected_12-07-2015_1_v8_lg_6	140536651	140547356	+	Lsat_1_v5_gn_6_85720	-	-	-	-
Lsat_1_v5_gn_2_108920	1150	310	16.1	66	3.13	194.797	327.032	62.5627	0.191304	-2.38606	1.28541e-08	2.16223e-05	Down	Dovetail_09Sept_Map_inspected_12-07-2015_1_v8_lg_2	187075154	187076590	-	Lsat_1_v5_gn_2_108920	-	GO:0006810:transport;	GO:0016021:integral component of membrane;	GO:0005215:transporter activity;
Lsat_1_v5_gn_2_85000	963	242	15.01	45	2.55	148.976	255.296	42.6564	0.167086	-2.58134	1.74991e-08	2.7596e-05	Down	Dovetail_09Sept_Map_inspected_12-07-2015_1_v8_lg_2	162664463	162671401	-	Lsat_1_v5_gn_2_85000	-	GO:0032259:methylation;	-	GO:0008171:O-methyltransferase activity;
Lsat_1_v5_gn_1_3021	366	485	79.16	89	13.27	298.006	511.647	84.3648	0.164889	-2.60044	9.13981e-12	5.7654e-08	Down	Dovetail_09Sept_Map_inspected_12-07-2015_1_v8_lg_1	3743280	3743645	-	Lsat_1_v5_gn_1_3021	-	-	-	-
Lsat_1_v5_gn_4_31120	1201	162	8.06	29	1.32	99.1952	170.901	27.4897	0.160852	-2.6362	4.26437e-07	0.000336245	Down	Dovetail_09Sept_Map_inspected_12-07-2015_1_v8_lg_4	45704749	45705949	+	Lsat_1_v5_gn_4_31120	-	-	-	-
Lsat_1_v5_gn_6_91941	1067	2048	114.66	349	17.85	1245.67	2160.52	330.824	0.153122	-2.70724	2.44367e-18	3.08293e-14	Down	Dovetail_09Sept_Map_inspected_12-07-2015_1_v8_lg_6	152224840	152226088	+	Lsat_1_v5_gn_6_91941	-	GO:0006810:transport;	GO:0016021:integral component of membrane;	GO:0005215:transporter activity;
Lsat_1_v5_gn_5_53841	1692	105	3.71	16	0.52	62.9678	110.769	15.1667	0.136922	-2.86857	3.30854e-06	0.00177619	Down	Dovetail_09Sept_Map_inspected_12-07-2015_1_v8_lg_5	126782437	126796921	+	Lsat_1_v5_gn_5_53841	-	-	-	-
Lsat_1_v5_gn_3_79201	1759	140	4.75	21	0.65	83.7991	147.692	19.9063	0.134783	-2.89129	2.56143e-07	0.000253269	Down	Dovetail_09Sept_Map_inspected_12-07-2015_1_v8_lg_3	109876822	109880137	-	Lsat_1_v5_gn_3_79201	-	-	-	-
Lsat_1_v5_gn_7_33081	1676	195	6.95	29	0.94	116.602	205.714	27.4897	0.133631	-2.90368	8.717e-09	1.57105e-05	Down	Dovetail_09Sept_Map_inspected_12-07-2015_1_v8_lg_7	45091951	45094649	-	Lsat_1_v5_gn_7_33081	-	-	-	-
Lsat_1_v5_gn_2_87161	752	84	6.67	12	0.87	49.9951	88.6152	11.375	0.128364	-2.96168	1.08184e-05	0.00413269	Down	Dovetail_09Sept_Map_inspected_12-07-2015_1_v8_lg_2	164398105	164398856	-	Lsat_1_v5_gn_2_87161	-	-	-	-
Lsat_1_v5_gn_1_41600	2880	82	1.7	11	0.21	48.4662	86.5053	10.4271	0.120537	-3.05245	8.51427e-06	0.00358053	Down	Dovetail_09Sept_Map_inspected_12-07-2015_1_v8_lg_1	47028461	47035061	-	Lsat_1_v5_gn_1_41600	-	-	-	-
Lsat_1_v5_gn_8_98801	900	47	3.12	6	0.36	27.6349	49.5823	5.68751	0.114709	-3.12395	0.000241275	0.0447635	Down	Dovetail_09Sept_Map_inspected_12-07-2015_1_v8_lg_8	145482838	145484950	+	Lsat_1_v5_gn_8_98801	-	-	-	-
Lsat_1_v5_gn_1_16900	1321	96	4.34	12	0.5	56.3247	101.274	11.375	0.112319	-3.15433	1.52677e-06	0.000895892	Down	Dovetail_09Sept_Map_inspected_12-07-2015_1_v8_lg_1	20194807	20198016	+	Lsat_1_v5_gn_1_16900	-	-	-	-
Lsat_1_v5_gn_7_94901	2970	43	0.86	5	0.09	25.0511	45.3625	4.7396	0.104483	-3.25866	0.000274879	0.0489719	Down	Dovetail_09Sept_Map_inspected_12-07-2015_1_v8_lg_7	159960766	159965173	+	Lsat_1_v5_gn_7_94901	-	GO:0042128:nitrate assimilation;GO:0055114:oxidation-reduction process;	-	GO:0050660:flavin adenine dinucleotide binding;GO:0009055:electron carrier activity;GO:0005506:iron ion binding;GO:0009703:nitrate reductase (NADH) activity;GO:0030151:molybdenum ion binding;GO:0020037:heme binding;GO:0043546:molybdopterin cofactor binding;
Lsat_1_v5_gn_7_10721	1186	645	32.49	68	3.13	372.448	680.438	64.4585	0.0947309	-3.40002	4.76723e-19	1.20287e-14	Down	Dovetail_09Sept_Map_inspected_12-07-2015_1_v8_lg_7	13489387	13490944	-	Lsat_1_v5_gn_7_10721	-	-	-	-
Lsat_1_v5_gn_9_13940	1139	139	7.29	13	0.62	79.48	146.637	12.3229	0.0840371	-3.57283	3.34792e-09	6.49806e-06	Down	Dovetail_09Sept_Map_inspected_12-07-2015_1_v8_lg_9	18891117	18892469	+	Lsat_1_v5_gn_9_13940	-	GO:0009664:plant-type cell wall organization;	GO:0005576:extracellular region;GO:0016020:membrane;	-
Lsat_1_v5_gn_2_79621	1002	50	2.98	4	0.22	28.2694	52.7471	3.79168	0.0718841	-3.79818	2.48581e-05	0.0079395	Down	Dovetail_09Sept_Map_inspected_12-07-2015_1_v8_lg_2	154879505	154880506	+	Lsat_1_v5_gn_2_79621	-	-	-	-
