# Supplementary material for: Enzymatic Activities and Gene Transcript Levels Associated with the Augmentation of Antioxidant Constituents during Drought Stress in Lettuce
Source: MDPI journal article supplement (doi:10.3390/horticulturae7110444), 2021-11-02
Supplement: s1 [file s1 › TableS3.xlsx]

## Sheet: Sheet1
category	term	ontology	numDEInCat	numInCat	over_represented_pvalue	over_represented_FDR	GeneNumber(Up)	GeneNumber(Down)
GO:0008171	O-methyltransferase activity	MF	2	9	0.000649142	0.838717	0	2
GO:0005200	structural constituent of cytoskeleton	MF	2	20	0.0039697	0.838717	0	2
GO:0007017	microtubule-based process	BP	2	23	0.00430384	0.838717	0	2
GO:0055114	oxidation-reduction process	BP	8	600	0.00506366	0.838717	3	5
GO:0000249	C-22 sterol desaturase activity	MF	1	1	0.00519131	0.838717	0	1
GO:0010279	indole-3-acetic acid amido synthetase activity	MF	1	1	0.00519132	0.838717	0	1
GO:0009703	nitrate reductase (NADH) activity	MF	1	1	0.00519132	0.838717	0	1
GO:0042128	nitrate assimilation	BP	1	1	0.00519132	0.838717	0	1
GO:0043546	molybdopterin cofactor binding	MF	1	1	0.00519132	0.838717	0	1
GO:0005654	nucleoplasm	CC	1	1	0.00519132	0.838717	0	1
GO:0010218	response to far red light	BP	1	1	0.00519132	0.838717	0	1
GO:0010378	temperature compensation of the circadian clock	BP	1	1	0.00519132	0.838717	0	1
GO:0051258	protein polymerization	BP	2	25	0.00536053	0.838717	0	2
GO:0048578	positive regulation of long-day photoperiodism, flowering	BP	1	2	0.00741651	1	0	1
GO:0010229	inflorescence development	BP	1	2	0.00745829	1	0	1
GO:0005874	microtubule	CC	2	30	0.0080213	1	0	2
GO:0030151	molybdenum ion binding	MF	1	2	0.0101018	1	0	1
GO:0005960	glycine cleavage complex	CC	1	3	0.0128738	1	0	1
GO:0019464	glycine decarboxylation via glycine cleavage system	BP	1	3	0.0128738	1	0	1
GO:0009415	response to water	BP	1	4	0.0134921	1	1	0
GO:0009738	abscisic acid-activated signaling pathway	BP	1	5	0.0140641	1	0	1
GO:0016706	oxidoreductase activity, acting on paired donors, with incorporation or reduction of molecular oxygen, 2-oxoglutarate as one donor, and incorporation of one atom each of oxygen into both donors	MF	2	41	0.0141644	1	0	2
GO:0042542	response to hydrogen peroxide	BP	1	4	0.0151127	1	0	1
GO:0009826	unidimensional cell growth	BP	1	4	0.0204589	1	0	1
GO:0003924	GTPase activity	MF	2	54	0.0207417	1	0	2
GO:0050660	flavin adenine dinucleotide binding	MF	2	52	0.0219383	1	1	1
GO:0009637	response to blue light	BP	1	5	0.022172	1	0	1
GO:0006184	GTP catabolic process	BP	2	56	0.0225991	1	0	2
GO:0000156	phosphorelay response regulator activity	MF	1	5	0.022774	1	0	1
GO:0005215	transporter activity	MF	2	54	0.0243443	1	0	2
GO:0048046	apoplast	CC	2	64	0.0286066	1	1	1
GO:0032259	methylation	BP	2	60	0.0300618	1	0	2
GO:0045338	farnesyl diphosphate metabolic process	BP	1	7	0.0357425	1	0	1
GO:0046274	lignin catabolic process	BP	1	7	0.0357697	1	1	0
GO:0020037	heme binding	MF	3	165	0.0361187	1	0	3
GO:0009664	plant-type cell wall organization	BP	1	10	0.0391018	1	0	1
GO:0034005	germacrene-A synthase activity	MF	1	8	0.040729	1	0	1
GO:0080167	response to karrikin	BP	1	10	0.0442006	1	0	1
GO:0009734	auxin-activated signaling pathway	BP	1	12	0.0477712	1	0	1
GO:0000160	phosphorelay signal transduction system	BP	1	13	0.0486537	1	0	1
